# Oncogenic *RAS* instructs morphological transformation of human epithelia via differential tissue mechanics.

## Authors

A. Nyga<sup>1,2</sup>, J. Muñoz<sup>3</sup>, S. Dercksen<sup>4</sup>, G. Fornabaio<sup>1,5</sup>, M. Uroz<sup>1</sup>, X. Trepap<sup>1,6,7,8</sup>, B. Baum<sup>2,9</sup>, H. Matthews<sup>9</sup>, V. Conte<sup>1,4,10,\*</sup>

## Affiliations

<sup>1</sup> Institute for Bioengineering of Catalonia (IBEC), The Barcelona Institute of Science and Technology (BIST), Barcelona – Spain

<sup>2</sup> MRC Laboratory of Molecular Biology, Cambridge – United Kingdom

<sup>3</sup> Department of Mathematics, Polytechnic University of Catalonia (UPC), Barcelona – Spain

<sup>4</sup> Department of Biomedical Engineering, Eindhoven University of Technology (TU/e), Eindhoven – the Netherlands

<sup>5</sup> Department of Physics, University of Barcelona (UB), Barcelona - Spain

<sup>6</sup> Centro de Investigación Biomédica en Red en Bioingeniería, Biomateriales y Nanomedicina (CIBER-BBN), Barcelona – Spain

<sup>7</sup> Department of Biomedicine, University of Barcelona (UB), Barcelona – Spain

<sup>8</sup> Institució Catalana de Recerca i Estudis Avançats (ICREA), Barcelona – Spain

<sup>9</sup> MRC Laboratory of Molecular Cell Biology, University College London (UCL), London – United Kingdom

<sup>10</sup> Institute for Complex Molecular Systems (ICMS), Eindhoven University of Technology (TU/e), Eindhoven – the Netherlands

\* Corresponding author: [v.conte@tue.nl](mailto:v.conte@tue.nl)

## Abstract

The *RAS* proto-oncogene is a critical regulator of cell state, morphology and mechanics, and plays a key role in cancer progression. Here, by using a human epithelial model in vitro, we ask how morpho-mechanical changes driven by oncogenic *RAS* activation at the level of individual cells are collectively integrated to drive changes in tissue behaviour. We found that the uniform oncogenic expression of *HRAS.V12* in confined epithelial monolayers causes reproducible changes in the structure and organization of the tissue, which acquires a transitory bilayered morphology. *RAS*-driven bilayering associates with reproducible layer-specific differences in cell-cell contractility and cell-matrix forces. These drive the initially flat tissues to form three-dimensional structures mimicking some of the behaviours seen in human cancers. Our findings establish a physical mechanism of cellular collectives through which uniform expression of *RAS* can be interpreted differently in different places of the same tissue to regulate its physiological and pathological morphology.

## 39 Introduction

40 Epithelia are layered tissues, which provide separation between the inside (the stroma) and external  
41 milieu (the lumen). To perform this barrier function, the morphology of the epithelial tissues must  
42 be maintained as individual cells proliferate and die. Maintenance of epithelial homeostasis requires  
43 control of cell density through the dynamic regulation of cell proliferation, cell packing(1) and cell  
44 extrusion(2–4); the maintenance of a sheet-like morphology through the tight association of  
45 intercellular junctions(5); and stable anchoring between cells and the extracellular matrix(6).  
46 Intercellular junctions and matrix adhesions give epithelia the mechanical stability required to  
47 maintain the homeostatic layered architecture(5, 6). A critical role in the maintenance of epithelial  
48 homeostasis is played by the *RAS* proto-oncogene(7, 8).

49 The activity of the RAS family of GTPases, HRAS, NRAS and KRAS plays a critical role in the  
50 RAS-ERK signalling, which controls cell growth, division and survival. This pathway is  
51 dysregulated in a number of human diseases such as RASopathies(9). In addition, more than 50%  
52 of cancers involve the hyperactivation of the *RAS/RAF/MEK/ERK* pathway(10, 11), with more than  
53 30% of all cancers being associated with specific activating mutations in *RAS* genes<sup>8–10</sup>. *RAS*-  
54 oncogenes disrupt epithelial homeostasis both in cell culture(12–22) (mostly studied by using  
55 clones) and in animal tissues(17, 18, 23–27). These studies show how *RAS*-transformed cells  
56 scattered within an epithelium may be segregated and expelled from the monolayer via extrusion  
57 or delamination(12, 14, 19, 20, 22, 23), through the mechanical engagement of the cellular interface  
58 with surrounding normal cells. Also, clusters of cells expressing oncogenic *RAS* or *SRC* (an  
59 upstream regulator of *RAS*(28)) can induce local dysplasia (23, 24, 26, 27), segregation(16, 24) or  
60 morphing(23, 24, 26, 27) of the affected area of the tissue as a consequence of differential  
61 mechanics along the extended interface between the non-transformed and transformed domains of  
62 the epithelial tissue.

63 These morpho-mechanical roles for *RAS* all rely on interfacial differences between juxtaposed non-  
64 transformed and *RAS*-transformed cells. Here, we have taken this further by monitoring, live, the  
65 impact of the uniform activation of oncogenic RAS on tissue morphology and mechanics. Our  
66 analysis reveals that uniform oncogenic RAS activation is sufficient to induce the separation of an  
67 epithelial monolayer into a multi-layered structure characterized by layer-specific differences in  
68 cell-cell contractility and cell-matrix adhesions. This transitory state of mechanical instability sets  
69 the tissue on a path to a 3D morphological transformation.

## 70 Results

### 71 Oncogenic *RAS*-expression induces the active dewetting of confined MCF10A monolayers

72 To systematically study the effects of *RAS*-activation on epithelial morphology and mechanics live  
73 (Fig. 1 A), we conditionally activated oncogenic *HRAS* in MCF10A human breast epithelial  
74 cells(29) (MCF10A/ER:HRAS<sup>V12</sup>). Rather than plating cells on stiff glass, for these experiments  
75 we used more-physiological(30) soft polyacrylamide-gel substrates with a stiffness of 12 kPa (see  
76 Materials & Methods) and a coating of rat tail collagen type-I micropatterned in circular shapes of  
77 400  $\mu\text{m}$  in diameter (Fig. 1 A). Epithelial cells were grown on these soft circular micropatterned  
78 substrates for 24 hours and either induced *HRAS.V12* expression by addition of 4-OHT (*RAS*-  
79 transformed) or DMSO for control (non-transformed). Surprisingly, we found that HRAS activation  
80 (Fig. 1B) was sufficient to transform the 2D epithelial monolayer into a 3D mass (Fig. 1 C-D and  
81 Fig. S1).

82 To define the path of this 2D-to-3D tissue transformation, we monitored the process via a set of  
83 objective morphological (Fig. 1) and mechanical measures (Fig. 2). Specifically, we quantified the  
84 area (Fig. 1 E), aspect ratio (Fig. 1 F-H), circularity (Fig. 1 I) and traction forces (Fig. 2) for each  
85 cellular island.

86 Morphological analyses revealed differences between RAS and control tissues beginning ~4 hours  
87 after *HRAS* induction. Whereas control tissues remained flat and maintained a near constant area  
88 throughout the time window of our analysis, from 4 hours after oncogenic *HRAS* induction, tissue  
89 islands exhibited a slow decrease in area. This decrease in circular area continued in an  
90 approximately symmetric fashion up until 24 hours after *HRAS* induction (Fig. 1 F-H), after which  
91 the symmetry of *RAS*-transformed islands started to break (Fig. 1 F-H). At this point, *RAS*-  
92 transformed tissues underwent a loss of tissue circularity and an increase in aspect ratio (Fig. 1 H-  
93 I). This was followed by a rapid transition as the 2D *RAS*-transformed epithelium started to morph  
94 into a 3D tissue (Fig. S1). None of these changes were seen in control tissues.

95 Mechanical analyses carried out using Traction Force Microscopy(31) showed that traction forces  
96 of higher magnitude were mainly localized at the periphery of both non-transformed and *RAS*-  
97 transformed tissues (Fig. 2 A, F-G). In both cases, the elastic strain energy actively transferred by  
98 the epithelium to the underlying substrate also followed a similar trend (Fig. S2). The concentration  
99 of traction force at the periphery of circular epithelia is in line with previous theoretical(32, 33) and  
00 experimental studies carried out on epithelial colonies of human colon carcinoma (HCT-8)(34) and  
01 on confined circular monolayers of canine kidney cells (MDCK)(35, 36).

02 We noticed that high traction forces tended to be more ordered at the epithelium's periphery (Fig.  
03 2 A,B). Thus, we turned our attention to the topology of the traction field by further quantifying the  
04 distribution and orientation of traction forces within the different quadrants of the epithelial  
05 domain's (Supplementary Text 1). Our analysis showed that high traction forces at the epithelial  
06 domain's periphery appeared to be oriented towards the epithelial domain's centre, whereas lower  
07 traction forces underneath the bulk of epithelia were less organised in both non-transformed and  
08 *HRAS*-transformed tissues (Fig. S3). In order to decompose the traction field along the directions  
09 normal and tangential to the epithelial domain's edge (Fig. S4), we computed: i) the net radial ( $T_{\perp}$ )  
10 and net tangential ( $T_{\parallel}$ ) traction force components as a function of time in the whole epithelial  
11 domain as well as in the central (inner) and peripheral (outer) domains (Fig. 2 E). These time-trends  
12 (Fig. 2 H-K) confirmed that the net physical interactions at the interface between epithelia and  
13 substrate developed along the direction perpendicular to the epithelium's edge for both non-  
14 transformed and *HRAS*-transformed epithelia throughout the analysis.

15 To further average out spatial-temporal fluctuations of the traction force field and to better visualize  
16 reproducible force patterns, we averaged the net radial traction components  $T_{\perp}$  in space, along lines  
17 concentric to the edge of the island. Upon displaying these space-averages as a function of distance  
18 from the epithelial domain's edge, we obtained kymographs of the net radial traction component  
19  $T_{\perp}$  for both non-transformed (Fig. 2 L) and *RAS*-transformed MCF10A epithelia (Fig. 2 M).  
20 Kymographs confirm that it is the intense net radial-traction components that concentrate mainly at  
21 the periphery of both non-transformed and *RAS*-transformed epithelia throughout the experiment.  
22 By analysing the stress distribution within the epithelial domain through Monolayer Stress  
23 Microscopy(31) (Materials&Methods), we further showed that non-transformed tissues  
24 successfully establish and maintain epithelial homeostasis by means of long-range transmission of  
25 physical forces throughout the monolayer from opposite locations of the epithelial domain's edge,  
26 which results in tension accumulating throughout the bulk of the epithelial domain (Fig. S5).

27 Our traction force analysis also showed that, unlike control epithelia, the average intensity of the  
28 traction field of *RAS*-transformed epithelia undergoes a characteristic two-phase oscillation in the  
29 time window of our analysis (Fig. 2 G). This was observed as a decreasing-increasing phase over  
30 the first 24 hours following *HRAS* induction – when average traction forces dropped for  
31 approximately 8 hours before recovering again by approximately 24 hours (Fig. 2 G-I and Fig. S3).  
32 This disrupts the mechanical homeostasis of intact non-transformed circular epithelia and sets them  
33 on course of an abrupt symmetric decrease in epithelial area within the first 24 hours of oncogene  
34 activation (Fig. 1 E) followed by a 2D-to-3D morphological transformation (Fig. 1 B and Fig. S1).

35 As expected, the overexpression of *KRAS*<sup>V12</sup> in confined circular epithelia respectively led to similar  
36 results (Fig. S6-S7). Upon *KRAS*<sup>V12</sup>-activation, confined circular monolayers of inducible  
37 MCF10A/ER:*KRAS*<sup>V12</sup> cells followed a similar morpho-mechanical fate to those of  
38 MCF10A/ER:*HRAS*<sup>V12</sup> cells, suggesting that different RAS isoforms *HRAS* and *KRAS* have similar  
39 morpho-mechanical effects (Fig. 2 and Fig. S3,S6-S7).

40 The relatively rapid morphological (Fig. 1) and mechanical (Fig. 2) changes observed in confined  
41 transformed MCF10A monolayers from t=24 hours onward are characteristic of a cellular process  
42 known as active dewetting. In a previous case(37), this has been associated with a monotonic  
43 increase in centripetal traction forces linked to the retraction of a circular confined monolayers of  
44 human-breast adenocarcinoma cells (MDA-MB-231). This led us to hypothesize that oncogenic  
45 *RAS* expression primed tissues for dewetting during the first 24 hours of *RAS* expression by  
46 inducing structural and mechanical changes within the monolayer while still morphologically flat.  
47 To test this, we turned our focus to the changes in tissue organization during the first 24 hours of  
48 cellular evolution from *RAS*-activation.

### 49 **Oncogenic *HRAS* expression triggers the bilayering of confined MCF10A monolayers**

50 By analysing movement of the tissue in the z-plane orthogonal to the underlying substrate, we  
51 observed early changes in the morphology of transformed tissues that were evident in measures of  
52 both nuclear and monolayer height (Fig. 3 A-B). Thus, within 24 hours of oncogene activation  
53 *RAS*-transformed tissues became an average of 25% thicker than non-transformed ones (Fig. 3 A  
54 and Fig. S8). This was accompanied by an increase in cell packing that was markedly higher in the  
55 confined *RAS*-transformed monolayers, leading to the observed decrease in the area of individual  
56 cells (Fig. 3 C). Both non-transformed and *RAS*-transformed MCF10A monolayers presented  
57 uniform nuclear heights up to 8 hours from oncogene activation (Fig. 3 B). Thereafter and up until  
58 24 hours, the nuclear heights of *RAS*-transformed tissues showed greater heterogeneity, an indicator  
59 of the presence of topological heterogeneities within the confined epithelium(38). Indeed, the *RAS*-  
60 expressing epithelium (but not the control) became multi-layered over this time period (Fig. 3 D).  
61 Confocal microscopy revealed how confined *RAS*-transformed epithelia segregated into two  
62 discrete tissue layers with very distinct organizations (Fig. 3 D-E). The cells forming the top layer  
63 of *RAS*-transformed tissues were flatter and more spread than those in the bottom layer (Fig. 3 E),  
64 having undergone a 1.5-fold increase in cell perimeter (Fig. 3 G) and a 3-fold average increase in  
65 the cell area (Fig. 3 F) without any substantial effect on cell shape – the cell aspect ratio remained  
66 approximately constant in both layers (Fig. 3 H). We next turned our focus on the cellular alterations  
67 that could cause the bilayering.

### 68 **Oncogenic *RAS*-expression induces layer-specific differences in cell-cell contractility and cell- 69 matrix adhesions of the confined MCF10A bilayers.**

70 Stable *RAS* transformation has been shown to disrupt cadherins to promote cell invasion(39–41).  
71 Therefore, we hypothesized that the bilayering induced by oncogenic *RAS*-expression might also  
72 be caused by disruption to cell-cell junctions. Non-transformed MCF10A cells constitutively  
73 expressed E-cadherin and, thus, exhibited uniform cell-cell junctions throughout the tissue.  
74 Strikingly, E-cadherin expression did not change during *RAS*-activation (Fig. 4 A). Nevertheless,  
75 we observed differences in the localization of E-cadherin in the two layers of the developing bilayer  
76 (Fig. 4 B). Cells in the bottom layer tended to have relatively low levels of E-Cadherin at cell-cell  
77 junctions, while junctional E-cadherin levels remained similar to those before *RAS* activation in the  
78 top layer (Fig. 4 C). In addition, the ratio of junctional to cytoplasmic E-cadherin was decreased in  
79 the bottom layer (Fig. 4 D), suggestive of a redistribution of the protein from junctions to cytoplasm.  
80 Intriguingly, this change in E-cadherin localization in the bottom layer induced by the *RAS*-  
81 transformation was paralleled by a reduction of cell-matrix adhesion between the epithelial cells of



82 this layer and the hydrogel substrate, as shown by a decrease in the expression of the collagen  
83 receptor integrin  $\beta 1$  (Fig. 4 E-G).

84 The structural alterations occurring in *RAS*-transformed epithelia at the level of cell-cell junctions  
85 (Fig. 4 A-E) and cell-matrix adhesions (Fig. 4 E-G) correlated with the initial decrease observed in  
86 traction forces transferred by the tissue to the substrate matrix during the first ~8 hours of oncogene  
87 induction (Fig. 2 G). However, traction forces recovered to pre-transformation levels by 24 hours  
88 of *RAS*-transformation (Fig. 2 G), while adhesion to the substrate kept decreasing without  
89 recovering (Fig. 4 E-G). Therefore, we hypothesized that active tension within the tissue might also  
90 be affected by the *RAS*-transformation. To further understand whether *RAS*-driven alterations to  
91 tissue structure also reflected on tissue tension (driven by the contractile cellular actomyosin  
92 cortex(42, 43)), we studied the distribution of key cortex components F-actin and pMLC2(44) in  
93 both non-transformed and *RAS*-transformed tissues. While non-transformed epithelia show uniform  
94 distribution of F-actin and pMLC2 (Fig. 5 A-C), oncogenic *RAS* expression induced a gradient in  
95 the distribution of F-actin and pMLC2 throughout the bilayer within 24 hours of oncogene  
96 activation (Fig. 5 D-H). F-actin and pMLC2 fluorescent intensity were increased at the periphery  
97 of the bottom layer of *RAS*-transformed bilayers (Fig. 5 D-F). This fluorescent intensity was lower  
98 and more heterogeneously distributed throughout the top layer (Fig. 5 G-H), although spots of  
99 highly increased pMLC2 expression were visible at the periphery and in the middle of top layer of  
00 *RAS*-transformed bilayers (Fig. 5 G). Unexpectedly, these results show that while non-transformed  
01 monolayers retain a uniform homogenous state of tension (Fig. S5) and organization (Fig. 1-2) as  
02 they grow under these conditions, the uniform expression of oncogenic *RAS* for 24 hours leads to  
03 the establishment of a tension gradient that destabilizes the tissue. Thus, *RAS*-transformed circular  
04 epithelia underwent a significant radially symmetric contraction (Fig. 1, E-I) and formed multiple  
05 layers with very different properties (Fig. 2). We hypothesised that these *RAS*-induced alterations  
06 to cell-cell junctions, cell-matrix junctions and tissue tension prime tissues for active dewetting. To  
07 test whether this is likely to be the case, we developed a simple computational model of circular  
08 cellular tissues.

### 09 **Oncogenic *RAS*-expression makes confined monolayers mechanically instable**

10 The circular tissue bilayers were modelled as a 2D continuum elastic disk with finite thickness in  
11 two-dimensional plain-stress approximation (Fig. 6 A, Materials & Methods). The tissue *in silico*  
12 is mechanically coupled to the substrate matrix at discrete focal contact points (Fig. 6 B). Elastic  
13 friction laws were used to emulate the dynamics of discrete focal contact points between cells of  
14 the monolayer and the substrate matrix in the simplest possible way(45) (Fig. 6 B). The finite  
15 element method was used to resolve tissue motion generated against friction with the substrate by  
16 active contractile cellular forces (Fig. 6 C-D and Materials & Methods). We assumed that local  
17 cellular contractility within the tissue was proportional to the relative fluorescence intensities of  
18 pMLC2 (Fig. 5 – Materials & Methods). The effects of *RAS*-induction within tissues were modelled  
19 based on experimental data as a local drop in cell-matrix adhesion from baseline pre-transformation  
20 levels (Fig. 6E – based on data in Fig. 4 G); and, concomitantly, a local rise in tissue tension (cell  
21 contractility) from baseline pre-transformation levels (Fig. 6 F – as observed in Fig. 5 C,F,H).

22 We considered 3 different topological scenarios to locally configure tension and adhesion. These  
23 were: i) a periphery-driven mechanism (Fig. 6 G-I), whereby increased cell-cell tension (Fig. 6 F)  
24 and decreased cell-matrix adhesion (Fig. 6 E) arise from cell contractility at the periphery of the  
25 circular epithelium (Fig. 6 G); ii) a random mechanism (Fig. 6 J-L), whereby increased cell-cell  
26 tension (Fig. 6 F) and decreased cell-matrix adhesion (Fig. 6 E) arise from cell contractility at  
27 randomly scattered locations throughout the epithelium(Fig. 6 J); and iii) a centre-driven  
28 mechanism (Fig. 6 M-O), whereby increased cell-cell tension (Fig. 6 F) and decreased cell-matrix  
29 adhesion (Fig. 6 E) arise from cell contractility at the centre of the circular epithelium (Fig. 6 M).  
30 We used finite element methods to model the mechanics of the tissue under the respective

31 conditions (Fig. 6 C-D, Materials & Methods and Supplementary Text 2). We then computed the  
32 profiles of the area of the circular tissue (Fig. 6 J-L) and the traction force transmitted by the tissue to  
33 the substrate (Fig. 6 M-O) in all three topological scenarios detailed above as a function of cellular  
34 contractility and/or cell-matrix adhesion (Fig. 6 G-O and Fig. S9-S10). In all three topological  
35 scenarios (Fig. 6 G-I), simulations confirmed that: i) local increases in cellular contractility (and,  
36 thus, global increases in tissue tension) are sufficient to explain the symmetric contraction of tissue  
37 area and the increase in traction-force intensity (Fig. S10); ii) the reduction in cell-matrix adhesion  
38 alone is sufficient to account for the reduction in traction-force intensity (Fig. S9); iii) the  
39 combination of the decrease in cell-matrix adhesion with the increase in active tissue tension can  
40 result in an oscillation of the traction force intensity (Fig. 6 I) of the kind we observed experimentally  
41 (Fig. 2 G,I) in conjunction with symmetric tissue retraction (Fig. 6 H and Fig. 1 E, H, I). This  
42 oscillation could not be produced by the centre-driven mechanism and was particularly pronounced  
43 in the periphery-driven mechanism (Fig. 6 G) – the latter more closely reflecting the experimental  
44 distribution of active contractility (F-actin and pMLC2) in *RAS*-transformed bilayers (Fig. 5 E-H).

45 Taken together, our computational analyses showed that the combination of the reduction in  
46 adhesion and the ensuing redistribution of active tension within *RAS*-transformed tissues towards  
47 their periphery is sufficient to induce a state of mechanical instability in these tissues during the  
48 first 24 hours of oncogene induction. This instability sets the transformed tissues on a path of  
49 symmetric contraction which effectively primes them for active dewetting from that point onward  
50 (Fig. 1).

## 51 Discussion

52 The *RAS*-genes superfamily functions as a crucial signalling hub within the cell, which controls  
53 several of its critical signalling cascades. This also reflects how profoundly the somatic and  
54 germline abnormal activity of *RAS* affects human development and disease(9–11). *RAS* mutation  
55 alters the morphology and mechanics of individual cells(46), and here we showed how these  
56 morpho-mechanical changes can collectively integrate at the tissue scale to instruct the abnormal  
57 morphing of epithelia (Fig. 1). Here, we have used a combined experimental and computational  
58 analysis to ask how *RAS*-driven changes in cellular morphologies and forces affect the homeostasis  
59 of intact confined MCF10A epithelial monolayers (Fig. 1,2). Our analysis shows, quite surprisingly,  
60 that uniform *RAS*-induction can lead to the formation and contraction of a complex 3D tissue  
61 architecture that undergoes active dewetting (Fig. S1).

62 This morpho-mechanical transformation is mediated by a series of changes in epithelial architecture  
63 and mechanics that are induced during the first 24 hours of uniform *RAS*-oncogene induction (Fig.  
64 3). These include: i) the establishment of two layers of cells that have very different patterns of a  
65 E-cadherin localization, with high E-cadherin cell-cell junctions in the top layer and low E-cadherin  
66 cell-cell junctions in the bottom layer (Fig. 4); ii) local reductions in cellular adhesion to the  
67 substrate (Fig. 4), leading to decreased traction-forces transferred by the affected tissues to the  
68 substrate (Fig. 2); and, iii) a redistribution of regulators of cellular tension (F-actin and pMLC2),  
69 which become concentrated at the periphery of the bilayer (Fig. 5). In the future it will be fascinating  
70 to assess how these local changes in cell biology are induced by the uniform expression of  
71 oncogenic *RAS*. Our analysis shows how these local heterogeneities, when combined, give rise to  
72 the change in overall tissue organization and mechanics.

73 Increased intercellular tension has been previously reported as a key driver for the active dewetting  
74 of circular monolayers of human breast adenocarcinoma cells (MDA-MB-231) *in vitro*(37). In this  
75 previous study, tension differential was induced via the upregulation of E-cadherin – which is not  
76 normally expressed by transformed MDA-MB-231 cells, unlike our MCF10A cells. Within  
77 approximately 25 hours of an increase in E-cadherin expression in MDA-MB-231 monolayers,  
78 these epithelia underwent a dramatic increase of intra- and inter-cellular tension that triggered the

79 decrease in tissue area and subsequent 2D-to-3D morphological transition of dewetting(37).  
80 Importantly, changes in E-cadherin levels alone could not account for tissues' active dewetting.  
81 Instead, a decrease in cell-matrix adhesion to the underlying substrate affected the cell-cell tension  
82 threshold that regulated the temporal onset of active dewetting of an island with a given initial  
83 diameter(37).

84 While the dewetting phenomenon that we observe is similar, the cause is very different in our  
85 system. In the case of circular MCF10A monolayers, the homeostatic balance between cell-matrix  
86 adhesion (Fig. 2) and cell-cell tension (Fig. S5) allows intact non-transformed monolayers to  
87 preserve their morphology throughout the time window of our analysis (Fig. 1). However, the  
88 uniform expression of oncogenic *RAS* disrupts this homeostatic equilibrium by eliciting non-  
89 uniform architectural (Fig. 3), structural (Fig. 4) and mechanical changes (Fig. 5) across the tissue.  
90 Our simulations show that the imbalance in cell-cell tension and cell-matrix adhesion brought about  
91 by oncogenic *RAS*-expression are sufficient to place transformed tissues into a state of mechanical  
92 instability (Fig. 6), which primes the tissues for active dewetting (Fig. 1).

93 Mechanical imbalance following the oncogenic expression of *RAS* has been previously shown to  
94 drive the pathological morphing of the pancreatic duct(26). There, simulation and experiment  
95 showed that oncogenic *RAS*-expression affected the mechanical balance between the non-  
96 transformed and the *RAS*-transformed domains of the duct by levelling the tensional gradient  
97 between the apical and basal sides of the *RAS*-transformed subdomain of the duct(26). Here,  
98 uniform oncogenic *RAS*-expression throughout the tissue leads to tensional imbalance and  
99 disruption of homeostatic equilibrium by inducing the formation of two tissue layers with very  
00 different adhesive and contractile properties. Importantly, by establishing a mechanical imbalance  
01 through *RAS*-transformed tissues, epithelial bilayering may also provide a favourable intermediate  
02 mechanism to abnormally morph tissues without the need for an extended interface with non-  
03 transformed tissues(16, 23, 24, 26, 27). Overall, our findings establish a new physical mechanism  
04 of cellular collectives through which *RAS* can regulate the physiological and pathological  
05 morphology of epithelia in human development and disease(9–11) autonomously of cell  
06 competition.

## 07 **Materials and Methods**

08 **MCF10A cell culture.** Immortalized epithelial breast cell line MCF10A was transfected with  
09 inducible <sup>12</sup>V-mutated form of the *HRAS* gene (a gift from Julian Downwards lab UCL, London,  
10 UK)(29), referred to as MCF10A/ER.HRAS V12. They were maintained in complete medium  
11 composed of: phenol-free DMEM-F12 medium (ThermoFisher, #11039047) supplemented with  
12 5% charcoal-stripped horse serum (ThermoFisher, #16050122), 100 U/ml penicillin and 100 µg/ml  
13 streptomycin (ThermoFisher, #15070), 20 ng/ml EGF (Peprotech, #AF100-15), 0.5 mg/ml  
14 hydrocortisone (Sigma, #H0888), 100 ng/ml cholera toxin (Sigma, #C8052) and 10 µg/ml insulin  
15 (Sigma, #I1882)(47), at 37°C in a humidified incubator with 5% CO<sub>2</sub>. Confluent cells were  
16 passaged every 2/3 days at 1:4 dilution.

17 **Polyacrylamide (PAA) gel substrates.** Glass-bottom 6-well dishes (#0 thickness, IBL,  
18 #220.200.020) were treated with a bind-silane solution consisting of PlusOne Bind-Silane (VWR,  
19 #17-1330-01) and acetic acid (Pancreac Quimica, #131008-1612) in absolute ethanol for 1 hr at  
20 room temperature (RT) in a fume hood. Wells were washed 3 time with ethanol and dried. PAA  
21 gels with a Young's modulus of 12 kPa were prepared by mixing 18.8% of 40% w/v acrylamide  
22 (Bio-Rad, #1610140), 8% of 2% w/v bis-acrylamide (Bio-Rad, #1610142), 0.5% of 10%  
23 ammonium persulfate (APS, Bio-Rad, #161-0700), 0.05% of N,N,N,N'-  
24 tetramethylethylenediamine (TEMED, Sigma Aldrich, #T9281), 0.7% of FluoSpheres carboxylate  
25 modified microspheres (0.2µm, dark red, ThermoFisher, #F8807) in HEPES solution  
26 (ThermoFisher, #15630056). 22 µl of solution was placed on the treated glass well and covered  
27 with 18 mm diameter coverslip. After 1hr polymerization at RT, PBS was added to the wells and  
28 coverslips were carefully removed. Gels were washed with PBS.

29 **Polydimethylsiloxane (PDMS) membranes.** SU8-50 master containing circular patterns of 400  
30 µm diameter and 50 µm height was prepared using conventional photolithography. PDMS was  
31 spin-coated on the masters to a thickness lower than the height of the SU8 features (15 µm) and  
32 cured overnight at 85°C. A thick border of PDMS was left at the edges of the membranes for the  
33 handling purpose. PDMS membranes were peeled off and kept at 4°C until use.

34 **Collagen patterning.** To pattern collagen on top of PAA gels, gels were functionalized with a  
35 solution of 1mg/ml Sulfo-SANPAH (sulfosuccinimidyl 6-(4'-azido-2'-nitrophenylamino)  
36 hexanoate, ThermoFisher, #22589) for 5 min under UV lamp (XX-15, UVP) under 365 nm  
37 wavelength. After washing off remaining Sulfo-Sanpah with sterile PBS, gels were left to air dry  
38 for 20 min inside a cell culture hood. PDMS membranes, passivated in 2% Pluronic F-127 (Sigma,  
39 #P2443) in ddH<sub>2</sub>O for at least 24 hours, were washed in PBS and air-dried inside a cell culture  
40 hood. PDMS membranes were placed on top of the PAA gels, and 50 µl of 0.1 mg/ml of rat tail  
41 collagen type I solution (First Link, #112296) was placed on top of the patterns. PAA gels were  
42 incubated overnight at 4°C.

43 **Monolayer patterning.** PDMS membranes were removed from top of the polyacrylamide gels by  
44 first adding sterile PBS. Gels were washed with PBS and incubated with 200 µl of 0.1mg/ml PLL-  
45 g-PEG solution (PLL(20)-g[3.5]-PEG(2), SUSOS AG) for 30 min at 37°C. In the meantime,  
46 MCF10A cells were trypsinised and counted. Following incubation, gels were washed once with  
47 PBS and air-dried for 5 min. 50 µl of MCF10A cell suspension containing 50,000 cells, was placed  
48 on top of the gel. Cells were incubated for 1 hour for attachment, the non-attached cells were washed  
49 3 times with PBS, and cells were incubated in DMEM-F12 media for 24 hr in 5% CO<sub>2</sub> at 37°C.

50 **Drug treatment.** After 24 hr incubation, supernatant was aspirated and fresh DMEM-F12 medium  
51 containing 4-hydroxytamoxifen (4-OHT, 100 nM, Sigma, #H7904) or equivalent amount of DMSO  
52 (1:1000, control) was added to conditionally express *HRAS*.



53 **Western Blot.** To confirm HRAS induction with 4-OTH, total cell protein lysates were obtained  
54 by lysing cells exposed to 100 nM 4-OHT with RIPA buffer (Thermo Fisher, #89900) containing  
55 phosphatase inhibitor cocktail 1 and 2 (Sigma Aldrich, P5726 & P2850) and protease inhibitor  
56 cocktail (Sigma Aldrich, #11836170001). Protein content was quantified with BCA Protein Assay  
57 kit according to manufacturer's instructions (Thermo Fisher, #23227) and 20 mg of protein was  
58 mixed with 2x Laemmli buffer (Sigma Aldrich, #S3401) and boiled for 5 min at 95°C. Protein were  
59 separated using MOPS buffer (Thermo Fisher, #NP0001) in NuPAGE 4-12% Bis Tris Protein Gels  
60 (Thermo Fisher, #NP0323BOX) at 150V for 70 min at RT. Proteins were transferred to a  
61 nitrocellulose membrane at 100V for 60 min at 4°C. Membranes were blocked for 30 min in 5%  
62 milk in TBST, followed by overnight incubation with primary antibodies diluted in 2.5% milk in  
63 TBST. Primary antibodies included rabbit phospho p44/42 MAPK (ERK1/2) (1:2000, Cell  
64 Signalling, #4370S), rabbit p44/42 MAPK (Erk1/2) (1:2000, Cell Signalling, #4695S), mouse E-  
65 cadherin (1:1000, BD, #610181). Primary antibodies were washed 3 times with TBST, followed by  
66 1 hour incubation with secondary antibodies diluted in 2.5% milk in TBST (1:5000, goat anti-rabbit  
67 HRP, or goat anti-mouse HRP, DAKO, #P0448 & #P0447). Membranes were washed 3 times with  
68 TBST and exposed to HRP substrate (Immobilon Crescendo, Millipore, #WBLUR0100) for  
69 chemiluminescence detection using ChemiDoc™ MP Imaging System (Bio-Rad).

70 **Time-lapse microscopy.** Multidimensional acquisitions were performed on an automated inverted  
71 microscope (Nikon Ti2 Eclipse, Nikon) using 20x objective (Nikon CFI Plan Apo 20X/0.75 Ph  
72 DM). Microscope was equipped with thermal, CO<sub>2</sub> and humidity control, and controlled using NIS  
73 software and perfect focus system. Images were obtained every 15 min over 50 hours. Up to 15  
74 independent patterns were imaged in parallel using a motorized XY stage.

75 **Traction force microscopy.** Traction forces were computed from hydrogel displacements through  
76 a custom-made software developed in the laboratory of Xavier Trepate, which is based on a Fourier-  
77 transform algorithm for elastic hydrogel substrates having finite thickness(48). Gel displacements  
78 between any experimental time point and a reference image obtained after cell trypsinization were  
79 computed by using a custom-made particle imaging velocimetry code developed in the laboratory  
80 of Xavier Trepate by using 32-pixel resolution and overlap of 0.5.

81 **Monolayer stress microscopy.** Inter-cellular and intra-cellular stresses in non-transformed  
82 MCF10A monolayers were computed via Monolayer Stress Microscopy(31) via a custom software  
83 implemented via the custom FEM-platform EMBRYO developed in the laboratory of José Muñoz.  
84 Briefly, the forces exerted by the elastic hydrogel substrate on the MCF10A epithelium (as a  
85 reaction to the traction force field transferred by the epithelium to the substrate) are equilibrated by  
86 the tensorial stress state within the epithelium. A necessary condition for the application of this  
87 technique is that epithelia maintain their monolayer architecture, a hypothesis only valid for non-  
88 transformed MCF10A monolayers in this study.

89 **Immunofluorescence.** Cells were fixed with 4% paraformaldehyde (PFA, Santa Cruz, #sc-281692)  
90 for 10 min and washed with PBS. Samples were incubated with block buffer containing 1% bovine  
91 serum albumin (BSA, Sigma, #A7906) and 0.3% Triton-X100 (Sigma, #T8787) in PBS at RT for  
92 1 hr. Primary antibodies (mouse E-cadherin, 1:1500, BD Biosciences, #610181; mouse integrin β1,  
93 1:250, Abcam, ab30394; rabbit pMLC2, 1:50, Cell Signalling, #3671S) were diluted in block buffer  
94 and incubated on top of samples overnight at 4°C. Subsequently, samples were incubated with  
95 secondary antibodies (FITC anti-mouse, 1:1000, Jackson Immuno Research, #715-545-150;  
96 AlexaFluor564 anti-rabbit, 1:500, Thermo Fisher, #A11035) for 2hr at RT. F-actin was stained by  
97 incubating for 30 min with phalloidin-iFluor594 cytoPainter (1:2000, Abcam, #ab176757) or  
98 Phalloidin-Atto 647N (1:1000, Sigma-Aldrich, #65906) at RT. In between steps, samples were  
99 washed with wash buffer (0.05% Tween-20 (Sigma, #P9416) in PBS). Samples were covered with  
00 Fluoroshield mounting medium containing DAPI (Sigma, #F6057) and stored at 4°C until imaging.

01 **Microscopy.** Fluorescent images of the patterns were acquired with an inverted microscope (Nikon  
02 Ti2 Eclipse, Nikon) with an objective 20x/0.75 (Nikon CFI Plan Apo 20X/0.75 Ph DM). Confocal  
03 images were taken using inverted confocal microscope Axio Observer 7 (Spectral Detection Zeiss  
04 LSM 800) using 40x/1.3 Oil DIC M27 or 63x/1.4 Oil DIC M27 objectives, with ZEN 2.3 imaging  
05 software. For integrin imaging, Zeiss Axiovert 200M microscope was used with 20x and 40x  
06 objective. For pMLC2 imaging, Zeiss LSM 780 microscope was used with 20x/0.8 M27 Plan-  
07 Aplanachromat and 40x/1.20 W Korr M27 C-Aplanachromat objectives using ZEN 2.1 SP3 software.

08 **Nanoindentation.** Monolayer stiffness (Young's modulus) was measured by means of the Piuma  
09 Nanoindenter (from Optics 11) fitted with a cantilever having stiffness of 0.05 N/m and spherical  
10 tip with a radius of 10  $\mu\text{m}$ . Four measurements were taken from 3 different samples. The Young's  
11 modulus of tissues before oncogene induction resulted to be  $1.363 \pm 0.504$  kPa (Mean $\pm$ SD).

12 **Image analysis.** In order to detect the physical properties of the epithelial monolayer from  
13 fluorescent images a pipeline was created in CellProfiler(49) and followed by post processing of  
14 the images and data in custom-made automatic workflow in MATLAB (License Number 284992).  
15 Images of nuclei and F-actin were used to detect both the individual nuclei and cell borders within  
16 monolayers. The intensity of the images was rescaled to the full range of the intensity histograms  
17 (minimum 0, maximum 1) and uneven illumination was corrected by subtracting a spline  
18 illumination function. Nuclei were segmented using the adaptive Otsu three-class thresholding with  
19 the middle intensity class assigned as the background. To improve detection, we optimized  
20 minimum diameter (16-pixel unit) and threshold correction factor (0.8). Clumped objects were  
21 distinguished by intensity and cell outlines by propagation method. The precision of nuclei  
22 detection was assessed by comparing the outcomes of the pipeline with manual nuclei detection in  
23 ImageJ. Features extracted from the image processing included cell ID, nuclei centres coordinates,  
24 areas and perimeters. Using custom-made workflow in MATLAB (License Number 284992), we  
25 calculated cell and nuclei shape indices and removed outliers (based on surface areas, shape index,  
26 nucleus areas).

27 **E-cadherin analysis.** To measure E-cadherin intensity a line was drawn using Fiji ImageJ(50)  
28 (version 1.53c) between two nuclei. The intensity range was then normalized by subtracting the 1<sup>st</sup>  
29 percentile and dividing by 99<sup>th</sup> percentile. The junctional intensity was extracted, and the ratio  
30 between junctional and cytoplasmic intensity was calculated by dividing the junctional value by  
31 average of the cytoplasmic value. **Integrin analysis.** To measure integrin intensity a global  
32 intensity value of the total image was obtained with ImageJ. **pMLC2 analysis.** Fluorescence  
33 intensity was determined using Fiji. Rectangular shape (531.37x290  $\mu\text{m}$ ) was placed from one end  
34 of the image to other encompassing the middle part of the pattern and the average intensity was  
35 measured. The background intensity was removed by calculating intensity in area outside of the  
36 pattern for each image. Data from three independent patterns were presented as mean $\pm$ standard  
37 error.

38 **Data analysis.** To perform statistical analysis GraphPad Prism (version 9.0.0) was used. Data  
39 distribution was assessed using D'Agostino and Pearson omnibus normality test. Data from all  
40 conditions had to pass the normality test to be included in parametric testing. For non-parametric  
41 data: a) two groups – Mann Whitney test; b) more than two groups – Kruskal-Wallis statistic test  
42 used with Dunn's Multiple Comparison Test; c) two groups over long time-course – 2-way  
43 ANOVA with Bonferroni post-test; d) one condition over long time-course – Friedman test with  
44 Dunn's multiple comparison test. P-value below 0.5 indicated statistical significance (\* $p < 0.05$ ,  
45 \*\* $p < 0.01$ , \*\*\* $p < 0.001$ ).

46 **Computational model.** The evolution of the net radial-traction components is modelled by  
47 resorting to a two-dimensional Finite Element (FE) model of the flat tissue. The flat tissue is  
48 represented by a circular domain  $\Omega$  with radius  $R$ , with two distinct subdomains: subdomain  $\Omega_1$

49 subjected to a constant baseline contractile force  $\varepsilon_0^c$  (pre-strain) and subdomain  $\Omega_2$  subjected to an  
50 additional active contractile strain  $\varepsilon^c$ , for a total contractile strain of  $\varepsilon = \varepsilon_0^c + \varepsilon^c$  (Fig.4B). The  
51 elastic domains  $\Omega_1$  and  $\Omega_2$  develop local tension as a consequence of these prescribed strains.  
52 Moreover, each domain is subjected to a specific degree of elastic adhesion with the underlying  
53 substrate, which is modelled as a set of nodal locations fixed in time. Weakening of cell-matrix  
54 adhesion is simulated by applying a reduction factor  $\alpha$  to the cell-matrix adhesion constant  $\kappa$ . The  
55 subdomains  $\Omega_1$  and  $\Omega_2$  are assumed to have linear elastic behavior and tissue motion is determined  
56 in the approximation of quasi-static equilibrium – there, the active contractility  $\varepsilon_0^c$  and the baseline  
57 pre-strain  $\varepsilon_0^c$  equilibrate the passive elastic forces within the tissue and the adhesion forces with the  
58 substrate. We then used experimental data to set the model’s parameters and Cauchy’s equation for  
59 elastic continua to determine model’s deformations in each of the subdomains  $\Omega_1$  and  $\Omega_2$   
60 (Supplementary Text 2).

## 61 References

- 62 1. R. Farhadifar, J. C. Röper, B. Aigouy, S. Eaton, F. Jülicher, The Influence of Cell  
63 Mechanics, Cell-Cell Interactions, and Proliferation on Epithelial Packing. *Current Biology*.  
64 **17**, 2095–2104 (2007).
- 65 2. L. Kocgozlu, T. B. Saw, A. P. Le, I. Yow, M. Shagirov, E. Wong, R.-M. Mège, C. T. Lim,  
66 Y. Toyama, B. Ladoux, Epithelial Cell Packing Induces Distinct Modes of Cell Extrusions.  
67 *Current Biology*. **26**, 2942–2950 (2016).
- 68 3. S. Ohsawa, J. Vaughen, T. Igaki, Cell Extrusion: A Stress-Responsive Force for Good or  
69 Evil in Epithelial Homeostasis. *Dev Cell*. **44**, 284–296 (2018).
- 70 4. J. Fadul, J. Rosenblatt, The forces and fates of extruding cells. *Current Opinion in Cell*  
71 *Biology*. **54**, 66–71 (2018).
- 72 5. C. Guillot, T. Lecuit, Mechanics of Epithelial Tissue Homeostasis and Morphogenesis.  
73 *Science*. **340**, 1185–1189 (2013).
- 74 6. K. L. Mui, C. S. Chen, R. K. Assoian, The mechanical regulation of integrin–cadherin  
75 crosstalk organizes cells, signaling and forces. *J Cell Sci*. **129**, 1093–1100 (2016).
- 76 7. H. Jiang, M. O. Grenley, M.-J. Bravo, R. Z. Blumhagen, B. A. Edgar, EGFR/Ras/MAPK  
77 Signaling Mediates Adult Midgut Epithelial Homeostasis and Regeneration in *Drosophila*.  
78 *Cell Stem Cell*. **8**, 84–95 (2011).
- 79 8. T. Matozaki, T. Kotani, Y. Murata, Y. Saito, Roles of Src family kinase, Ras, and mTOR  
80 signaling in intestinal epithelial homeostasis and tumorigenesis. *Cancer Science*. **n/a**,  
81 doi:<https://doi.org/10.1111/cas.14702>.
- 82 9. K. A. Rauen, The RASopathies. *Annu. Rev. Genom. Hum. Genet*. **14**, 355–369 (2013).
- 83 10. T. G. Bivona, Dampening oncogenic RAS signaling. *Science*. **363**, 1280–1281 (2019).
- 84 11. S. Li, A. Balmain, C. M. Counter, A model for RAS mutation patterns in cancers: finding  
85 the sweet spot. *Nature Reviews Cancer*. **18**, 767–777 (2018).
- 86 12. C. Hogan, S. Dupré-Crochet, M. Norman, M. Kajita, C. Zimmermann, A. E. Pelling, E.  
87 Piddini, L. A. Baena-López, J.-P. Vincent, Y. Itoh, H. Hosoya, F. Pichaud, Y. Fujita,

- 88 Characterization of the interface between normal and transformed epithelial cells. *Nature*  
89 *Cell Biology*. **11**, 460–467 (2009).
- 90 13. S. K. Wu, G. A. Gomez, M. Michael, S. Verma, H. L. Cox, J. G. Lefevre, R. G. Parton, N.  
91 A. Hamilton, Z. Neufeld, A. S. Yap, Cortical F-actin stabilization generates apical–lateral  
92 patterns of junctional contractility that integrate cells into epithelia. *Nature Cell Biology*. **16**,  
93 167–178 (2014).
- 94 14. M. Kajita, K. Sugimura, A. Ohoka, J. Burden, H. Sukanuma, M. Ikegawa, T. Shimada, T.  
95 Kitamura, M. Shindoh, S. Ishikawa, S. Yamamoto, S. Saitoh, Y. Yako, R. Takahashi, T.  
96 Okajima, J. Kikuta, Y. Maijima, M. Ishii, M. Tada, Y. Fujita, Filamin acts as a key regulator  
97 in epithelial defence against transformed cells. *Nature Communications*. **5**, 4428 (2014).
- 98 15. G. Slattum, Y. Gu, R. Sabbadini, J. Rosenblatt, Autophagy in Oncogenic K-Ras Promotes  
99 Basal Extrusion of Epithelial Cells by Degrading S1P. *Current Biology*. **24**, 19–28 (2014).
- 00 16. S. Porazinski, J. de Navascués, Y. Yako, W. Hill, M. R. Jones, R. Maddison, Y. Fujita, C.  
01 Hogan, EphA2 Drives the Segregation of Ras-Transformed Epithelial Cells from Normal  
02 Neighbors. *Current Biology*. **26**, 3220–3229 (2016).
- 03 17. S. Kon, K. Ishibashi, H. Katoh, S. Kitamoto, T. Shirai, S. Tanaka, M. Kajita, S. Ishikawa, H.  
04 Yamauchi, Y. Yako, T. Kamasaki, T. Matsumoto, H. Watanabe, R. Egami, A. Sasaki, A.  
05 Nishikawa, I. Kameda, T. Maruyama, R. Narumi, T. Morita, Y. Sasaki, R. Enoki, S. Honma,  
06 H. Imamura, M. Oshima, T. Soga, J. Miyazaki, M. R. Duchon, J.-M. Nam, Y. Onodera, S.  
07 Yoshioka, J. Kikuta, M. Ishii, M. Imajo, E. Nishida, Y. Fujioka, Y. Ohba, T. Sato, Y. Fujita,  
08 Cell competition with normal epithelial cells promotes apical extrusion of transformed cells  
09 through metabolic changes. *Nature Cell Biology*. **19**, 530–541 (2017).
- 10 18. O. Zajac, J. Raingeaud, F. Libanje, C. Lefebvre, D. Sabino, I. Martins, P. Roy, C. Benatar,  
11 C. Canet-Jourdan, P. Azorin, M. Polrot, P. Gonin, S. Benbarche, S. Souquere, G. Pierron, D.  
12 Nowak, L. Bigot, M. Ducreux, D. Malka, C. Lobry, J.-Y. Scoazec, C. Eveno, M. Pocard, J.-  
13 L. Perfettini, D. Elias, P. Dartigues, D. Goéré, F. Jaulin, Tumour spheres with inverted  
14 polarity drive the formation of peritoneal metastases in patients with hypermethylated  
15 colorectal carcinomas. *Nature Cell Biology*, 1 (2018).
- 16 19. J. L. Teo, G. A. Gomez, S. Weeratunga, E. M. Davies, I. Noordstra, S. Budnar, H. Katsuno-  
17 Kambe, M. J. McGrath, S. Verma, V. Tomatis, B. R. Acharya, L. Balasubramaniam, R. M.  
18 Templin, K.-A. McMahon, Y. S. Lee, R. J. Ju, S. J. Stebhen, B. Ladoux, C. A. Mitchell, B.  
19 M. Collins, R. G. Parton, A. S. Yap, Caveolae Control Contractile Tension for Epithelia to  
20 Eliminate Tumor Cells. *Developmental Cell*. **54**, 75-91.e7 (2020).
- 21 20. S. Chagnon-Lessard, H. Jean-Ruel, M. Godin, A. E. Pelling, Mechanotransduction of strain  
22 regulates an invasive phenotype in newly transformed epithelial cells. *bioRxiv*. **1**, 1–14  
23 (2019).
- 24 21. S. Moitrier, N. Pricoupenko, A. Kerjouan, C. Oddou, O. Destaing, A. Battistella, P.  
25 Silberzan, I. Bonnet, Local light-activation of the Src oncoprotein in an epithelial monolayer  
26 promotes collective extrusion. *Communications Physics*. **2**, 1–11 (2019).
- 27 22. S. K. Wu, A. K. Lagendijk, B. M. Hogan, G. A. Gomez, A. S. Yap, Active contractility at E-  
28 cadherin junctions and its implications for cell extrusion in cancer. *Cell cycle (Georgetown,*  
29 *Tex.)*. **14**, 315–322 (2015).



- 30 23. C. Bielmeier, S. Alt, V. Weichselberger, M. La Fortezza, H. Harz, F. Jülicher, G. Salbreux,  
31 A.-K. Classen, Interface Contractility between Differently Fated Cells Drives Cell  
32 Elimination and Cyst Formation. *Current Biology*. **26**, 563–574 (2016).
- 33 24. D. A. Prober, B. A. Edgar, Interactions between Ras1, dMyc, and dPI3K signaling in the  
34 developing *Drosophila* wing. *Genes Dev*. **16**, 2286–2299 (2002).
- 35 25. A. Sasaki, T. Nagatake, R. Egami, G. Gu, I. Takigawa, W. Ikeda, T. Nakatani, J. Kunisawa,  
36 Y. Fujita, Obesity Suppresses Cell-Competition-Mediated Apical Elimination of RasV12-  
37 Transformed Cells from Epithelial Tissues. *Cell Reports*. **23**, 974–982 (2018).
- 38 26. H. A. Messal, S. Alt, R. M. M. Ferreira, C. Gribben, V. M.-Y. Wang, C. G. Cotoi, G.  
39 Salbreux, A. Behrens, Tissue curvature and apicobasal mechanical tension imbalance  
40 instruct cancer morphogenesis. *Nature*. **566**, 126–130 (2019).
- 41 27. J. Ling, M. Scaff, M. Tiwari, Y. Chen, J. Li, J. Jones, G. L. Sen, RAS-mediated  
42 suppression of PAR3 and its effects on SCC initiation and tissue architecture occur  
43 independently of hyperplasia. *J Cell Sci*. **133** (2020), doi:10.1242/jcs.249102.
- 44 28. S. Bunda, P. Heir, T. Srikumar, J. D. Cook, K. Burrell, Y. Kano, J. E. Lee, G. Zadeh, B.  
45 Raught, M. Ohh, Src promotes GTPase activity of Ras via tyrosine 32 phosphorylation.  
46 *PNAS*. **111**, E3785–E3794 (2014).
- 47 29. M. Molina-Arcas, D. C. Hancock, C. Sheridan, M. S. Kumar, J. Downward, Coordinate  
48 direct input of both KRAS and IGF1 receptor to activation of PI 3-kinase in KRAS mutant  
49 lung cancer. *Cancer Discov*. **3**, 548–563 (2013).
- 50 30. M. Plodinec, M. Loparic, C. A. Monnier, E. C. Obermann, R. Zanetti-Dallenbach, P. Oertle,  
51 J. T. Hyotyla, U. Aebi, M. Bentires-Alj, R. Y. H. Lim, C.-A. Schoenenberger, The  
52 nanomechanical signature of breast cancer. *Nature Nanotechnology*. **7**, 757–765 (2012).
- 53 31. X. Serra-Picamal, V. Conte, R. Sunyer, J. J. Muñoz, X. Trepap, in *Methods in Cell Biology*,  
54 E. K. Paluch, Ed. (Academic Press, 2015);  
55 <http://www.sciencedirect.com/science/article/pii/S0091679X14000375>), vol. 125 of  
56 *Biophysical Methods in Cell Biology*, pp. 309–330.
- 57 32. A. F. Mertz, S. Banerjee, Y. Che, G. K. German, Y. Xu, C. Hyland, M. C. Marchetti, V.  
58 Horsley, E. R. Dufresne, Scaling of traction forces with the size of cohesive cell colonies.  
59 *Physical Review Letters*. **108** (2012), doi:10.1103/PhysRevLett.108.198101.
- 60 33. S. Banerjee, M. C. Marchetti, Contractile stresses in cohesive cell layers on finite-thickness  
61 substrates. *Physical Review Letters*. **109** (2012), doi:10.1103/PhysRevLett.109.108101.
- 62 34. Y. Zhang, X. Shi, T. Zhao, C. Huang, Q. Wei, X. Tang, L. C. Santy, M. T. A. Saif, S. Zhang,  
63 A traction force threshold signifies metastatic phenotypic change in multicellular epithelia.  
64 *Soft Matter*. **15**, 7203–7210 (2019).
- 65 35. J. Notbohm, S. Banerjee, K. J. C. Utuje, B. Gweon, H. Jang, Y. Park, J. Shin, J. P. Butler, J.  
66 J. Fredberg, M. C. Marchetti, Cellular Contraction and Polarization Drive Collective  
67 Cellular Motion. *Biophysical Journal*. **110**, 2729–2738 (2016).

- 68 36. M. Deforet, V. Hakim, H. G. Yevick, G. Duclos, P. Silberzan, Emergence of collective  
69 modes and tri-dimensional structures from epithelial confinement. *Nature Communications*.  
70 **5**, 1–9 (2014).
- 71 37. C. Pérez-González, R. Alert, C. Blanch-Mercader, M. Gómez-González, T. Kolodziej, E.  
72 Bazellieres, J. Casademunt, X. Trepat, Active wetting of epithelial tissues. *Nature Physics*.  
73 **15** (2019), doi:10.1038/s41567-018-0279-5.
- 74 38. S. Neelam, P. R. Hayes, Q. Zhang, R. B. Dickinson, T. P. Lele, Vertical uniformity of cells  
75 and nuclei in epithelial monolayers. *Scientific Reports*. **6**, 19689 (2016).
- 76 39. Q. Li, R. R. Mattingly, Restoration of E-cadherin Cell-Cell Junctions Requires Both  
77 Expression of E-cadherin and Suppression of ERK MAP Kinase Activation in Ras-  
78 Transformed Breast Epithelial Cells. *Neoplasia*. **10**, 1444–1458 (2008).
- 79 40. C. R. Schmidt, Y. J. Gi, R. J. Coffey, R. D. Beauchamp, A. S. Pearson, Oncogenic Ras  
80 dominates overexpression of E-cadherin in malignant transformation of intestinal epithelial  
81 cells. *Surgery*. **136**, 303–309 (2004).
- 82 41. C. R. Schmidt, M. K. Washington, Y. J. Gi, R. J. Coffey, R. D. Beauchamp, A. S. Pearson,  
83 Dysregulation of E-cadherin by oncogenic ras in intestinal epithelial cells is blocked by  
84 inhibiting MAP kinase. *The American Journal of Surgery*. **186**, 426–430 (2003).
- 85 42. N. C. Heer, A. C. Martin, Tension, contraction and tissue morphogenesis. *Development*. **144**,  
86 4249–4260 (2017).
- 87 43. P. Chugh, A. G. Clark, M. B. Smith, D. A. D. Cassani, K. Dierkes, A. Ragab, P. P. Roux, G.  
88 Charras, G. Salbreux, E. K. Paluch, Actin cortex architecture regulates cell surface tension.  
89 *Nature Cell Biology*. **19**, 689–697 (2017).
- 90 44. Z. M. Goeckeler, R. B. Wysolmerski, Myosin light chain kinase-regulated endothelial cell  
91 contraction: the relationship between isometric tension, actin polymerization, and myosin  
92 phosphorylation. *Journal of Cell Biology*. **130**, 613–627 (1995).
- 93 45. A. Christensen, A.-K. V. West, L. Wullkopf, J. T. Erler, L. B. Oddershede, J. Mathiesen,  
94 Friction-limited cell motility in confluent monolayer tissue. *Phys. Biol.* **15**, 066004 (2018).
- 95 46. H. K. Matthews, S. Ganguli, K. Plak, A. V. Taubenberger, Z. Win, M. Williamson, M. Piel,  
96 J. Guck, B. Baum, Oncogenic Signaling Alters Cell Shape and Mechanics to Facilitate Cell  
97 Division under Confinement. *Developmental Cell*. **52**, 563–573.e3 (2020).
- 98 47. J. Debnath, S. K. Muthuswamy, J. S. Brugge, Morphogenesis and oncogenesis of MCF-10A  
99 mammary epithelial acini grown in three-dimensional basement membrane cultures.  
00 *Methods*. **30**, 256–268 (2003).
- 01 48. X. Trepat, M. R. Wasserman, T. E. Angelini, E. Millet, D. A. Weitz, J. P. Butler, J. J.  
02 Fredberg, Physical forces during collective cell migration. *Nature Physics* (2009),  
03 doi:10.1038/nphys1269.
- 04 49. A. E. Carpenter, T. R. Jones, M. R. Lamprecht, C. Clarke, I. H. Kang, O. Friman, D. A.  
05 Guertin, J. H. Chang, R. A. Lindquist, J. Moffat, P. Golland, D. M. Sabatini, CellProfiler:

06 Image analysis software for identifying and quantifying cell phenotypes. *Genome Biology*  
07 (2006), doi:10.1186/gb-2006-7-10-r100.

- 08 50. J. Schindelin, I. Arganda-Carreras, E. Frise, V. Kaynig, M. Longair, T. Pietzsch, S.  
09 Preibisch, C. Rueden, S. Saalfeld, B. Schmid, J.-Y. Tinevez, D. J. White, V. Hartenstein, K.  
10 Eliceiri, P. Tomancak, A. Cardona, Fiji - an Open Source platform for biological image  
11 analysis. *Nat Methods*. **9** (2012), doi:10.1038/nmeth.2019.

## 12 13 **Acknowledgements**

14 This work was supported by the Spanish Ministry MICINN /FEDER (grants BFU2016-75101-P  
15 and RYC-2014-15559 to V.C., DPI2016-74929-R to J.J.M., BES-2017-081337 to G.F., BES-2013-  
16 062633 to M.U.); the Generalitat de Catalunya (grant 2017SGR1278 to J.J.M.); the IBEC-ICMS  
17 Exchange Program fund to A.N. for nanoindentation measurements; H.K.M was supported by a  
18 CRUK/EPSRC Multi-disciplinary Project Award (C1529/A23335) and the MRC/UCL Laboratory  
19 for Molecular Cell Biology (MC\_CF12266). The Spanish Ministry (MICINN) and its funding  
20 programs (Severo Ochoa, FPI, Excelencia) along with the CERCA Program of the Generalitat de  
21 Catalunya support research at the IBEC. The authors would also like to thank: Carlos Pérez-  
22 González (IBEC); Víctor González-Tarragó (IBEC); Manuel Gómez González (IBEC); Prof  
23 Bouten (TU/e, ICMS); and, Janine Grolleman (TU/e, ICMS) for helpful technical advice and  
24 support.

## 25 **Author contributions**

26 A.N. and V.C. designed experiments; A.N. performed all experiments with contributions from S.D.,  
27 G.F. and H.M.; A.N., M.U. and H.M. designed protocols; J.M. designed and implemented the  
28 computational model; B.B. and H.M. provided the cellular model; X.T. provided custom software  
29 for Traction Force Microscopy; A.N., J.M., S.D. and V.C. performed data analysis; A.N., J.M.,  
30 S.D., X.T., H.M., B.B. and V.C. interpreted data; V.C. conceived the study, secured the funding  
31 and supervised the project. A.N., J.M. and V.C. wrote the manuscript, which all authors reviewed  
32 and edited.

## 33 **Competing interests**

34 The authors declare no competing interests.

## 35 **Data availability**

36 All data supporting the findings of this study are available from the corresponding author upon  
37 reasonable request.

## 38 **Code availability**

39 Custom code may be made available from the corresponding author upon reasonable request.

40

## 41 Figure Legends

42

### 43 Fig. 1.

44 **Morphological characterization of normal and *HRAS*-transformed MCF10A tissues.** (A)  
45 Schematic of the experimental setup. (B) *HRAS* induction confirmed by increase in phosphorylation  
46 of MAPK (ERK1/2) shown in representative Western Blots. (C) Phase contrast time-lapse of  
47 selected non-transformed (control) and *HRAS*-transformed MCF10A monolayers (imaging starts at  
48  $t=-4$  hours and *HRAS*-activation is induced at  $t=0$  hours; scale bar is 200  $\mu\text{m}$ ). (D) Contours of  
49 epithelia shown in panel C (time progresses with blue, red, green and yellow colours). (E) Time-  
50 evolution of the surface area of the epithelia's footprint on the substrate matrix (epithelial domain);  
51 (F-G) time-evolution of the major and minor diameters of the epithelia domain in the case of (F)  
52 non-transformed and (G) *HRAS*-transformed tissues – these quantities are defined as the axes of  
53 the elliptical envelope having the same normalized second central moments as the epithelial  
54 domain; (H) time-evolution of the epithelial domain's aspect ratio – this quantity is defined as the  
55 major axis divided by the minor axis of the epithelial domain's (as defined in subpanels F-G); (I)  
56 time-evolution of the epithelial domain's circularity – this quantity is defined as  $4\pi$  times the area  
57 (as defined in subpanel E) divided by the squared perimeter of the epithelium's domain. (E-I)  
58 Statistics over 15 non-transformed epithelia and 16 *HRAS*-transformed epithelia from at least 4  
59 independent experiment repeats. Each epithelium was imaged for at least 50 hours. Median over  
60 each epithelial domain at each time point of its evolution. Time-evolution graphs represent  
61 Mean $\pm$ S.E.M. of medians at each time point. 2-way ANOVA with Bonferroni post-test, \* $p<0.05$ .

### 62 Fig. 2.

63 **Mechanical characterization of normal and *HRAS*-transformed MCF10A tissues.**  
64 Overlays of traction-force vectors (A-B) and traction-force magnitude maps (C-D) on phase contrast  
65 images of confined MCF10A epithelia; (A,C) representative non-transformed epithelium at  $t=19$  hours;  
66 (B,D) representative *HRAS*-transformed epithelium at  $t=45$  hours. (E) Schematic representing the  
67 whole epithelial domain along with its outer and inner subdomains. (F-K) Time evolution of  
68 magnitudes and components of the traction-force field in the whole epithelial domain (blue) as well as  
69 in the inner (orange) and outer (green) epithelial subdomains. (F-G) Time evolution of the average  
70 Traction-field  $\pm$  magnitude for (F) non-transformed epithelia and (G) *HRAS*-transformed epithelia. (H-  
71 K) Time evolution of the average traction force components: (H-I) perpendicular to the epithelial  
72 domain's edge ( $T_{\perp}$ ) for (H) non-transformed and (I) *HRAS*-transformed epithelia; (J-K) tangential to  
73 the epithelial domain's edge ( $T_{\parallel}$ ) for (J) non-transformed and (K) *HRAS*-transformed epithelia. (L-M)  
74 Kymographs of the radial (perpendicular) component of the traction field  $T_{\perp}$ : (L) for a representative  
75 non-transformed MCF10A epithelium and (M) for a representative *HRAS*-transformed MCF10A  
76 epithelium. White lines represent the average evolution of the edge of the island in time, the centre of  
77 the island colocalizing with the bottom of the graph. A negative component  $T_{\perp}$  (red) means that the  
78 corresponding traction-force vector is in oriented towards the exterior of the epithelial domain's edge,  
79 whereas a positive component  $T_{\perp}$  (green) is indicative of traction-force orientation toward the interior  
80 of the epithelial domain's edge. (F-K) Statistics over 15 non-transformed epithelia and 16 *HRAS*-  
81 transformed epithelia from at least 4 independent experiment repeats. Each epithelium was imaged  
82 for at least 50 hours. Median over each epithelial domain at each time point of its evolution. Time-  
83 evolution graphs represent Mean $\pm$ S.E.M of medians at each time point. 2-way ANOVA with  
84 Bonferroni post-test, \* $p<0.05$ .

85

### 86 Figure 3.

87 **Oncogenic *HRAS*-expression induces the bilayering of MCF10A monolayers.**  
88 (A-C) Measurements of epithelial monolayers features at selected time points for both non-  
89 transformed and *HRAS*-transformed epithelia: (A) tissue height, (B) nucleus height and (C) cell



90 area ( $\text{mm}^2$ ). Kruskal-Wallis statistic test with Dunn's Multiple Comparison Test. **(D)**  
91 Representative confocal images of non-transformed monolayer (top-two subpanel) and *HRAS*-  
92 transformed bilayer (bottom-two subpanel) at  $t=24$  hours from oncogene induction – focal planes  
93 is orthogonal to the substrate matrix (z-axis). Actin is labelled in red and DAPI in blue. Scale bar =  
94  $20 \mu\text{m}$ . **(E)** Representative confocal image of non-transformed monolayer and *HRAS*-transformed  
95 bilayer – focal plane crosses the tissue parallelly to the substrate matrix. Actin is labelled in shades  
96 of grey and DAPI in blue. Scale bar =  $15 \mu\text{m}$ . **(F-H)** Quantification of cell features in the top and  
97 bottom layers of *HRAS*-transformed bilayers: **(F)** cell surface area, **(G)** cell surface perimeter and  
98 **(H)** cell shape index. Mean $\pm$ S.E.M. of median values from at least 3 individual patterns. Mann  
99 Whitney test, \*\*\*  $p<0.001$ .

#### 00 **Figure 4.**

01 **Oncogenic *HRAS*-expression alters the expression of E-cadherin and  $\beta 1$ -integrin.**  
02 **(A)** Western Blot showing E-cadherin expression in non-transformed (control) and *HRAS*-  
03 transformed MCF10A cells over 48 hours from oncogene induction. **(B)** Representative confocal  
04 images showing the distribution of E-cadherin at  $t=0$  hours and within non-transformed and *HRAS*-  
05 transformed tissues at  $t=24$  hours. E-cadherin labelled in grey, DAPI in blue. Scale bar =  $50 \mu\text{m}$ .  
06 **(C-D)** Global E-cadherin fluorescence in non-transformed (control) and *HRAS*-transformed  
07 epithelia: **(C)** junctional intensity (normalized) and **(D)** Ratio of junctional to cytoplasmic intensity.  
08 **(E)** Confocal images of non-transformed and *HRAS*-transformed epithelia after 7 and 24 hours of  
09 oncogene induction stained for E-cadherin (red), DAPI (blue) and integrin  $\beta 1$  (green in panels at  
10 the centre and shades of greys in panels on the right). Scale bar =  $20 \mu\text{m}$  **(F)** Confocal images of  
11 entire non-transformed monolayer and *HRAS*-transformed bilayer after 24 hours of oncogene  
12 induction stained for integrin  $\beta 1$  (shades of greys) – focal plane crosses the tissue parallelly to the  
13 substrate matrix. Scale bar =  $50 \mu\text{m}$ . **(G)** Intensity of global  $\beta 1$ -integrin fluorescence in non-  
14 transformed and *HRAS*-transformed epithelia after 7 and 24 hours of oncogene induction. **E-**  
15 **cadherin:** Mean $\pm$ S.E.M. of median values from at least 3 individual patterns and Kruskal-Wallis  
16 statistic test with Dunn's Multiple Comparison Test. **Integrin:** Mean $\pm$ S.E.M.; 2-way ANOVA with  
17 Bonferroni post-test. \* $p<0.05$ , \*\* $p<0.01$ , \*\*\* $p<0.001$ .

#### 18 19 **Figure 5.**

20 **Oncogenic *HRAS*-induction causes a tension differential in the MCF10A bilayers.**  
21 Representative confocal images of non-transformed monolayer **(A)** and *HRAS*-transformed bilayer  
22 **(D)** at  $t=24$  hours from oncogene induction stained for pMLC2, F-actin and DAPI (shades of greys)  
23 – focal planes are orthogonal to the substrate matrix. Scale bar =  $20 \mu\text{m}$ . **(B,E,G)** Representative  
24 confocal images of entire non-transformed monolayer **(B)** and *HRAS*-transformed bilayer **(E,**  
25 **bottom layer and G top layer of the bilayer)** – focal plane crosses the tissue parallelly to the substrate  
26 matrix. pMLC2, F-actin and DAPI (nuclei) are labelled either in colour code (red, grey and blue  
27 respectively) or shades of greys. Scale bar =  $50 \mu\text{m}$  **(C)** Averaged global intensity of pMLC2  
28 fluorescence from edge to edge of the circular epithelial domain of non-transformed monolayers  
29 ( $n=3$  and mean $\pm$ S.D. in blue) **(F,H)** Averaged global intensity of pMLC2 fluorescence from edge  
30 to edge of the circular epithelial domain of *HRAS*-transformed bilayers ( $n=3$ ): **(F)** mean $\pm$ S.D. of  
31 bottom layers (in pink); and **(H)** individual intensity profiles for the three top layers (in red).

#### 32 **Figure 6.**

33 ***In silico* model of *HRAS*-driven mechanical instability in MCF10A circular tissues.**  
34 **(A-B)** Schematic representing the experimental features captured and emulated by the  
35 computational model. **(A)** The epithelium is represented as a 2D continuum (bulk stiffness  $E$  and  
36 Poisson Ratio  $\nu$ ) having finite thickness in plane-stress approximation (grey). **(B)** Schematic  
37 representing the inter- and intra-cellular forces along with the cell-matrix forces at the interface  
38 with the elastic substrate. The entire domain of the epithelium is uniformly subjected to a contractile

39 pre-strain constant in time (green arrows, Materials&Methods). A subdomain  $\Omega_2$  of the epithelial  
40 domain (light grey) can also develop further contractile strain (active tension) – the distribution of  
41 tension within the epithelium represented here corresponds to that one illustrated in panel G. Active  
42 tensions and pre-strain equilibrate passive elastic forces within the epithelium and result in traction  
43 forces (magenta arrows) being transferred to the substrate matrix via elastic friction (blue springs).  
44 **(C)** Finite element discretization of the 2D epithelium with a representative finite element  
45 represented in dark grey and outlined in black. **(D)** Forces acting at nodes of a representative finite  
46 element. **(E)** Adhesion with substrate stays at pre-transformation levels in correspondence with the  
47 epithelial subdomain  $\Omega_1$  that is subject to pre-strain only whereas it decreases by 70% in  
48 correspondence with the epithelial subdomain  $\Omega_2$ , which is subject to additional active tension. **(F)**  
49 Active intercellular tension increases monotonically within the epithelial subdomain  $\Omega_2$ . **(G,J,M)**  
50 Schematics illustrating the different topologies according to which active tension can locally  
51 increase within the tissue (subdomains  $\Omega_1$  and  $\Omega_2$  are color-coded in green and orange respectively).  
52 **(H,K,N)** Epithelial surface area trends in correspondence to each of the scenarios in panels G-I  
53 respectively. **(I,L,O)** Epithelial traction force trends in correspondence to each of the scenarios in  
54 panels G-I respectively.

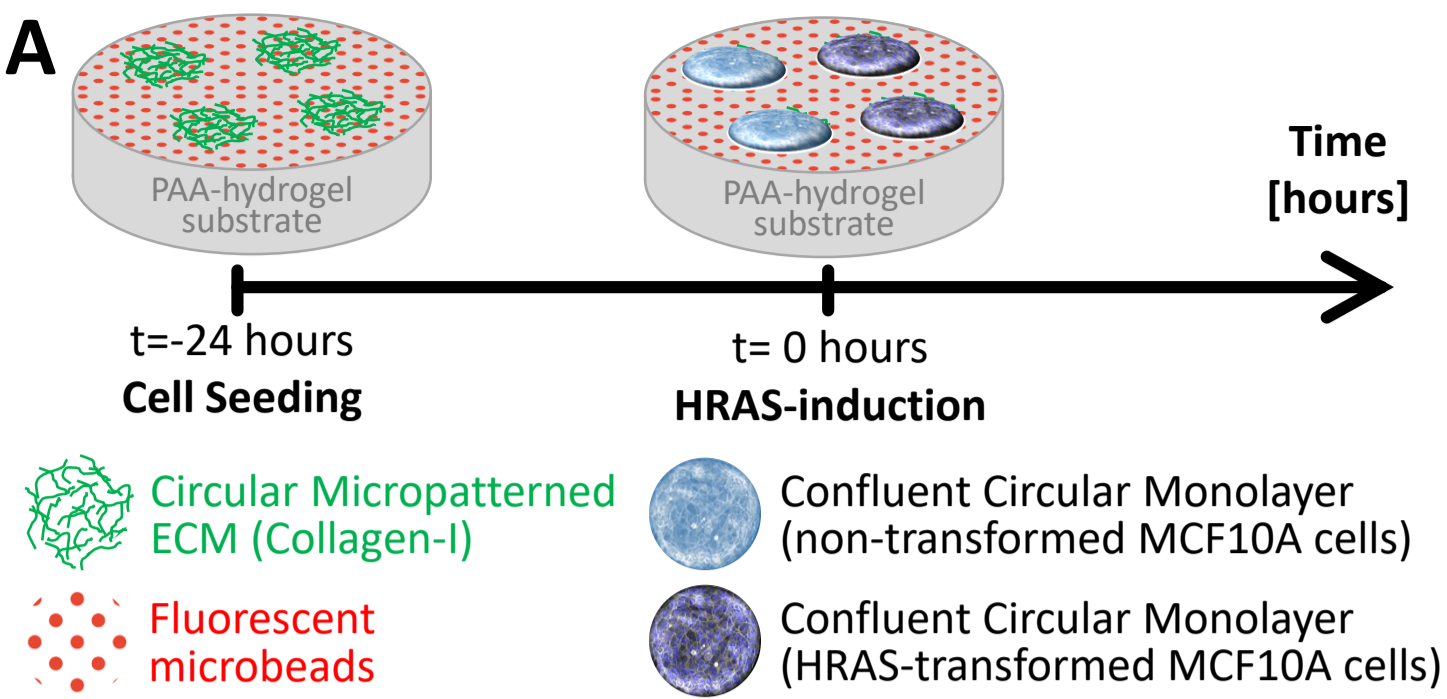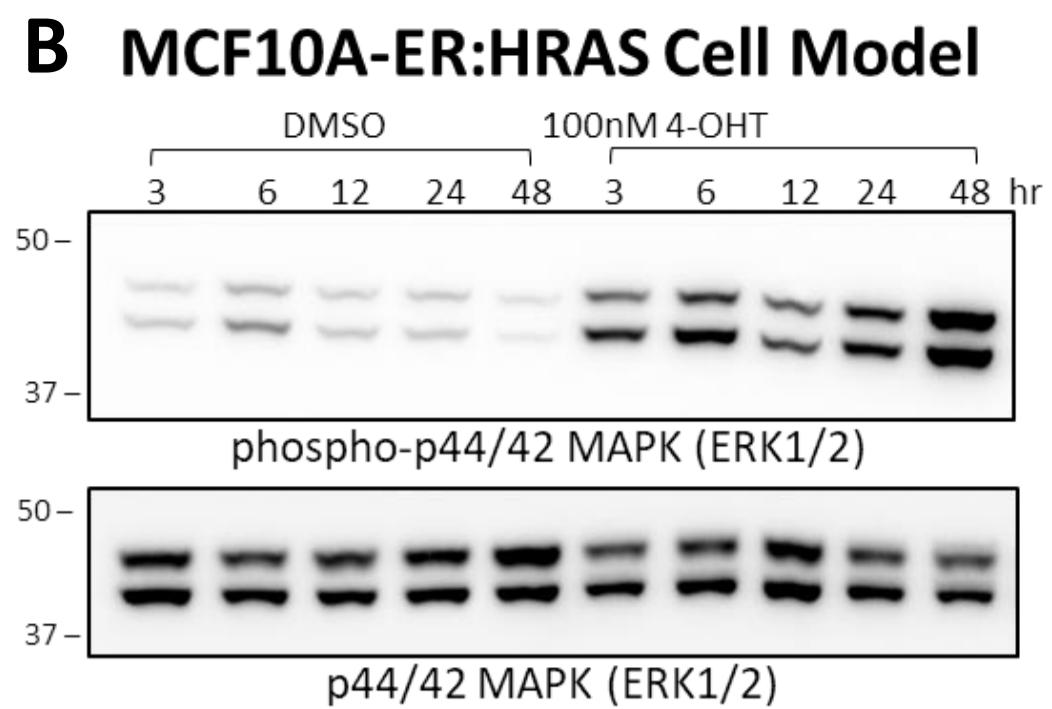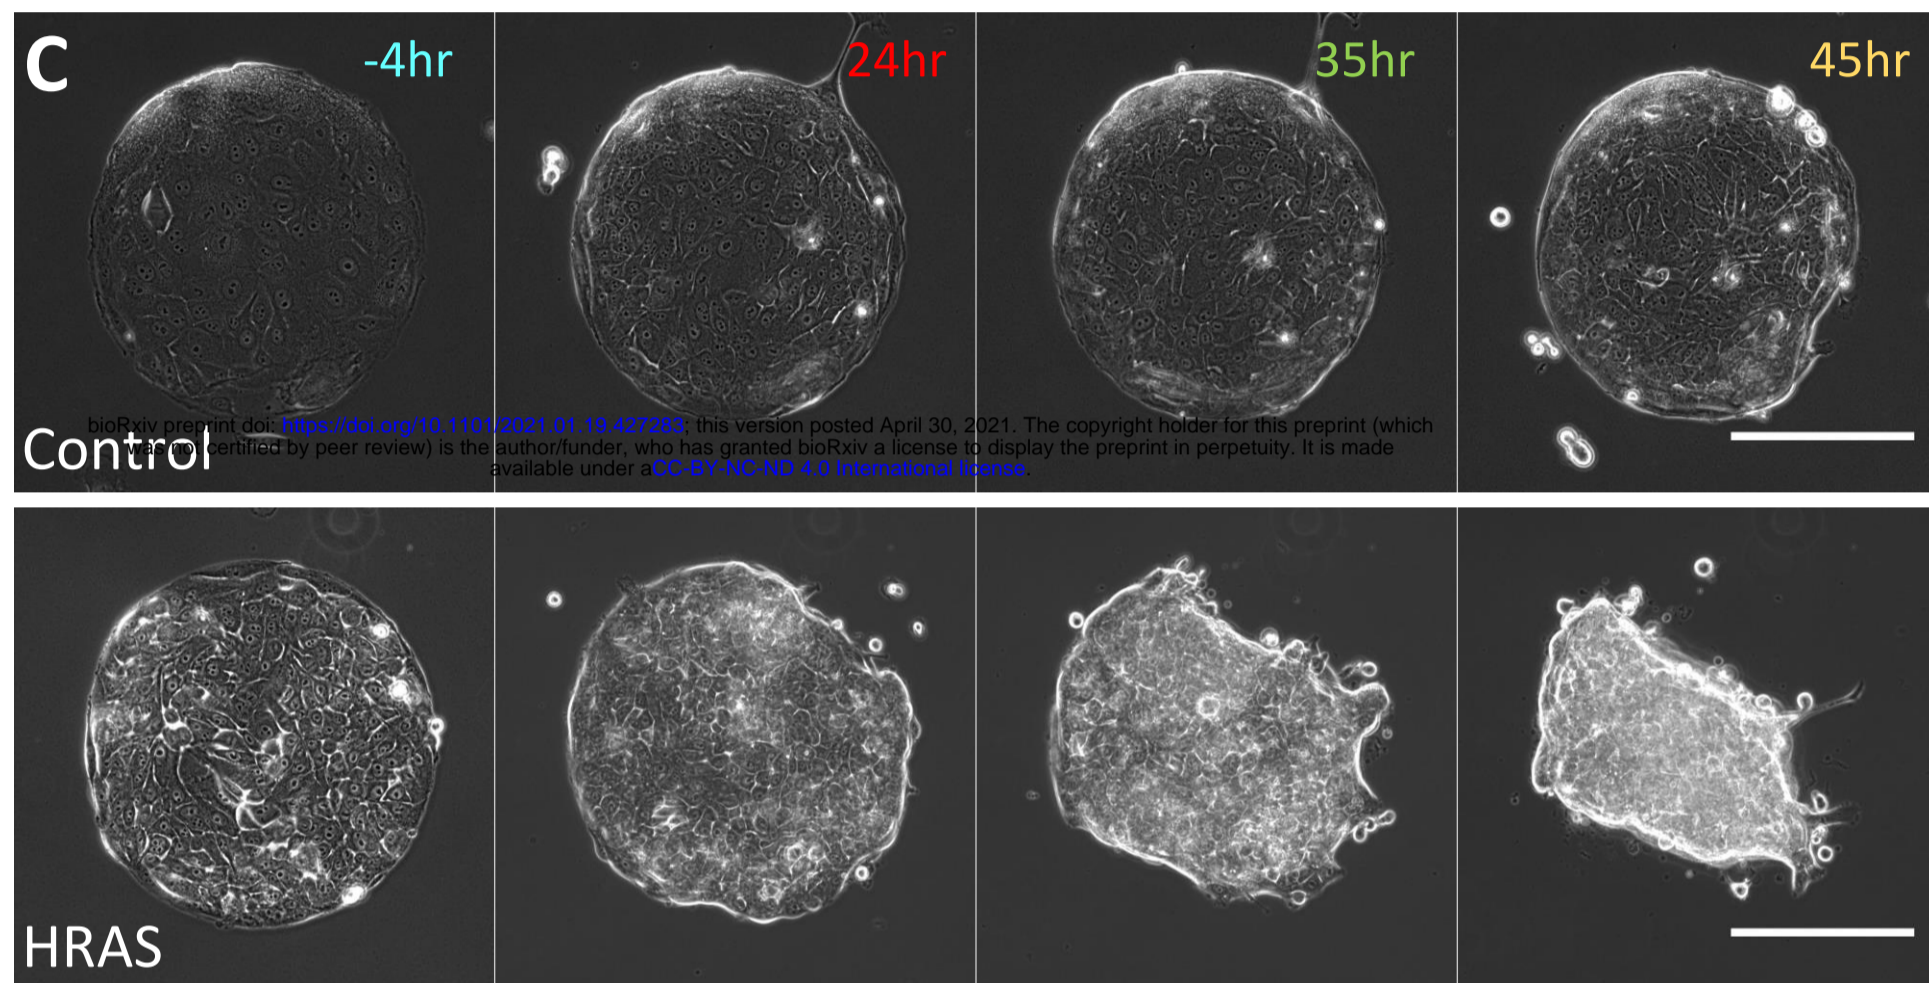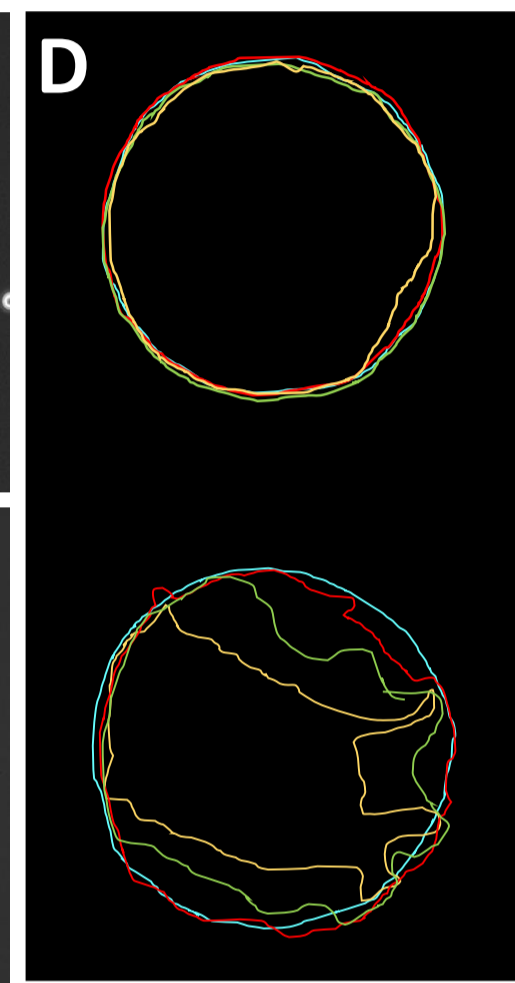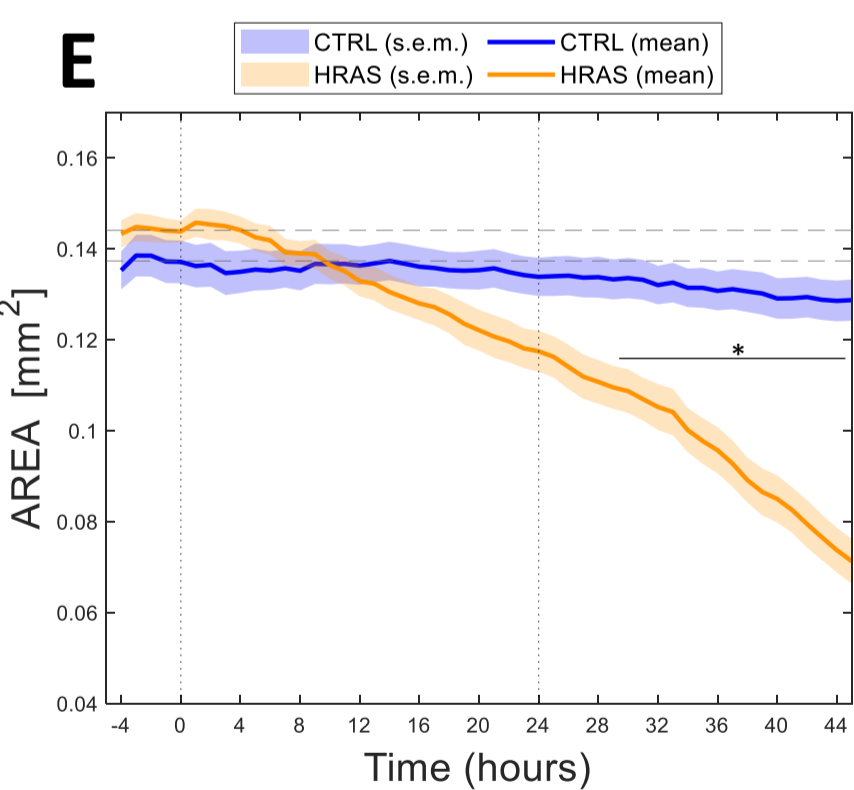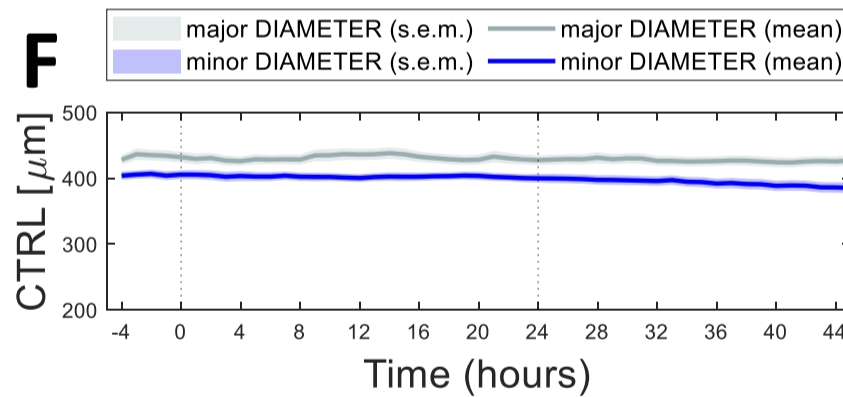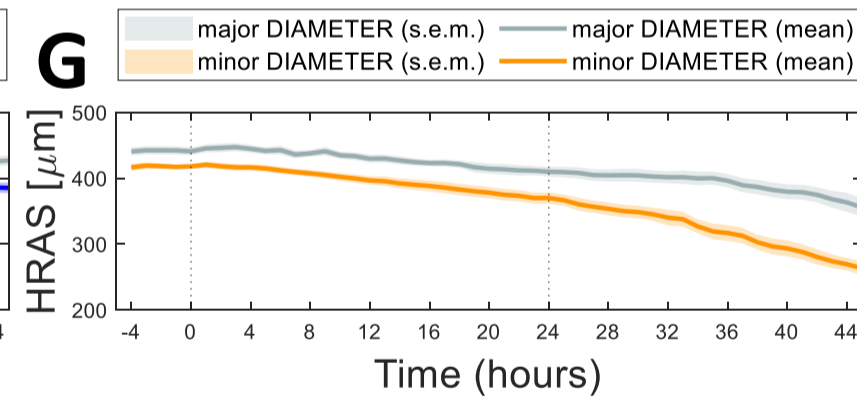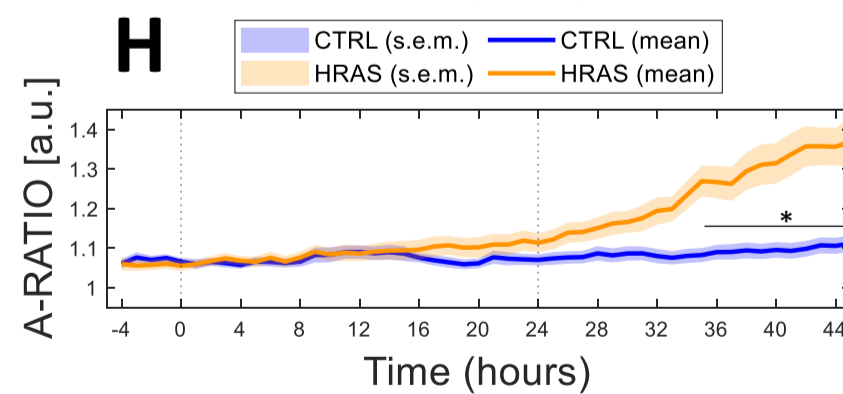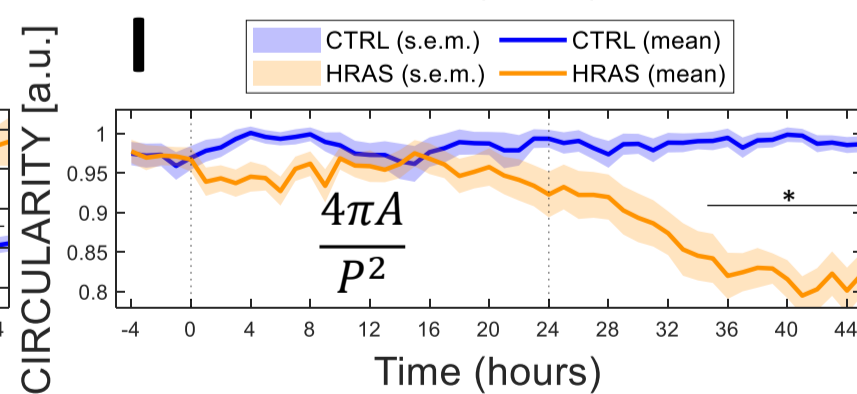



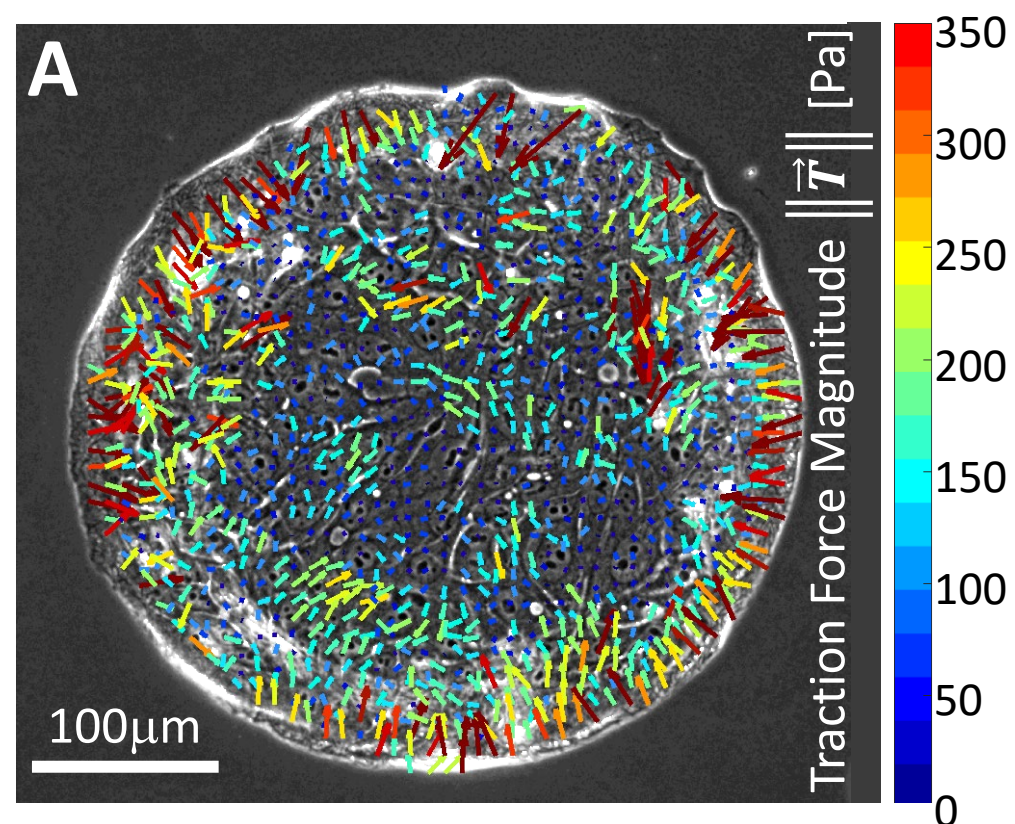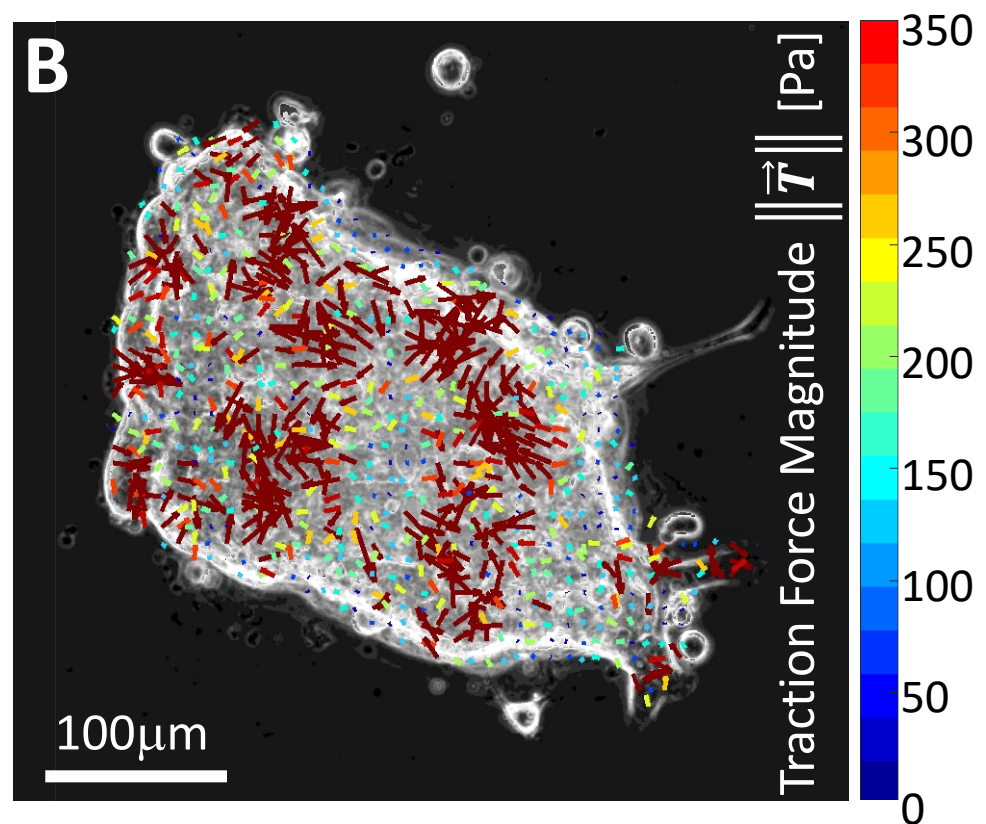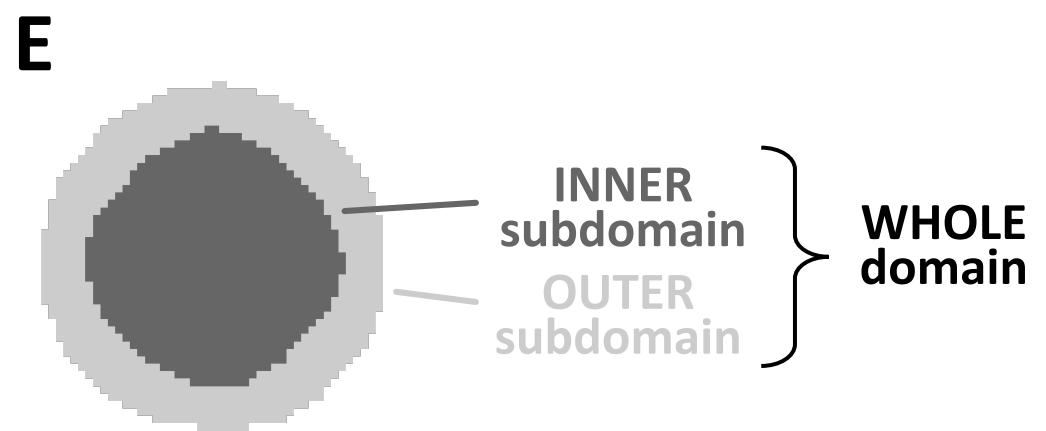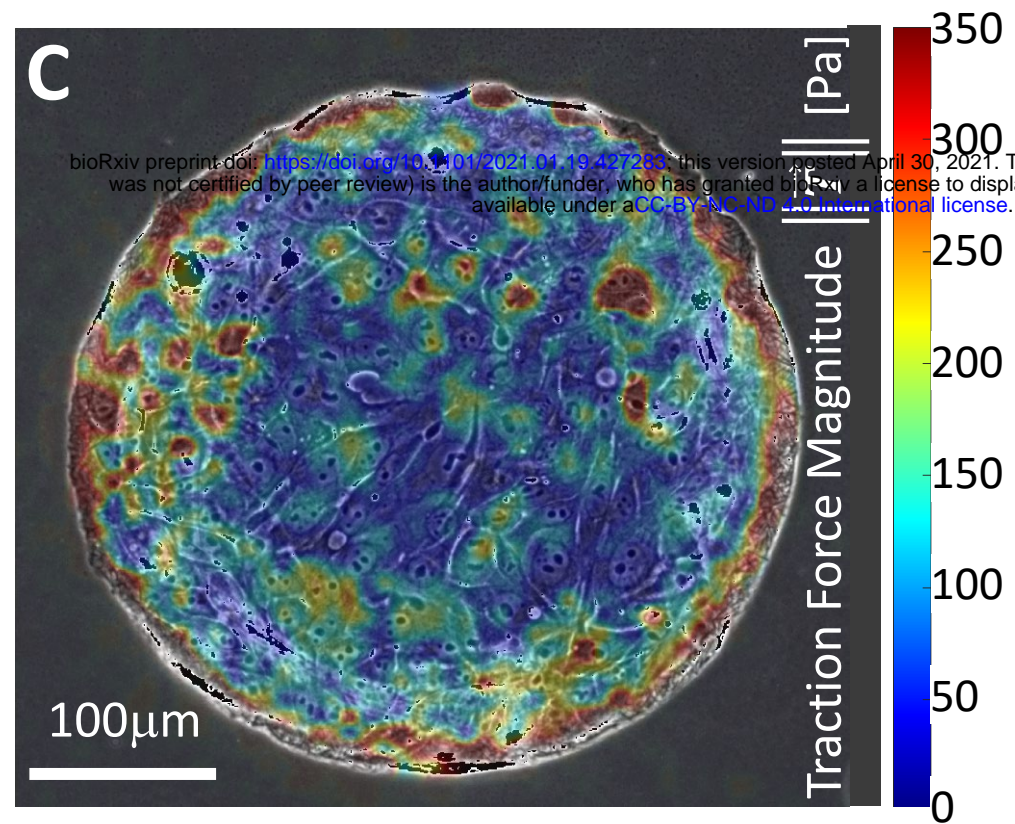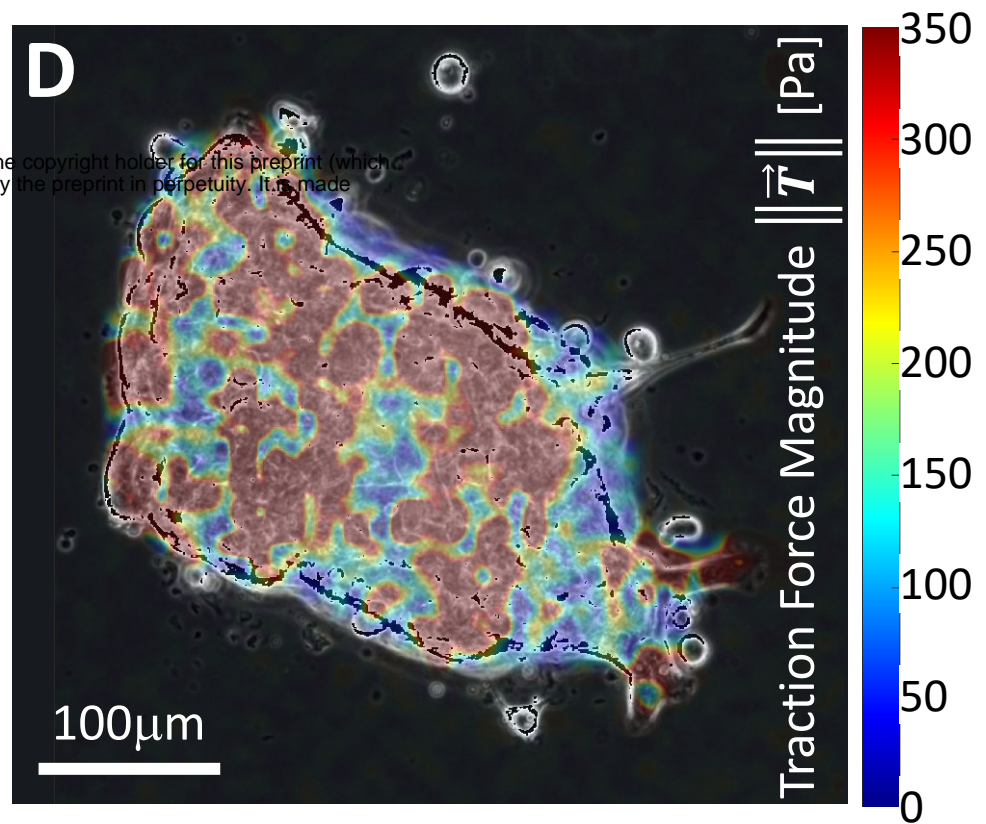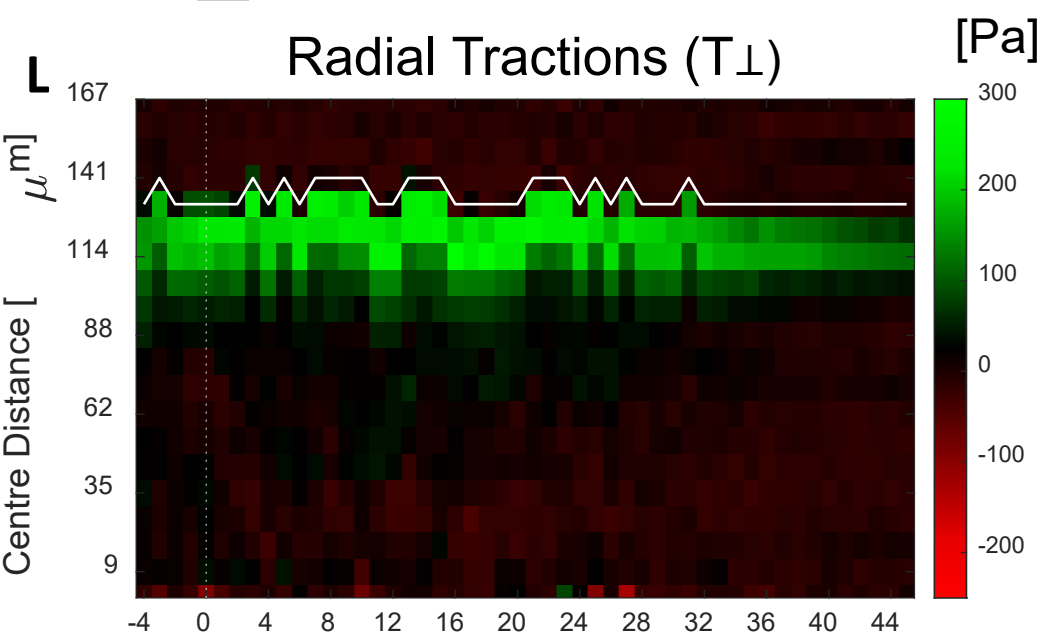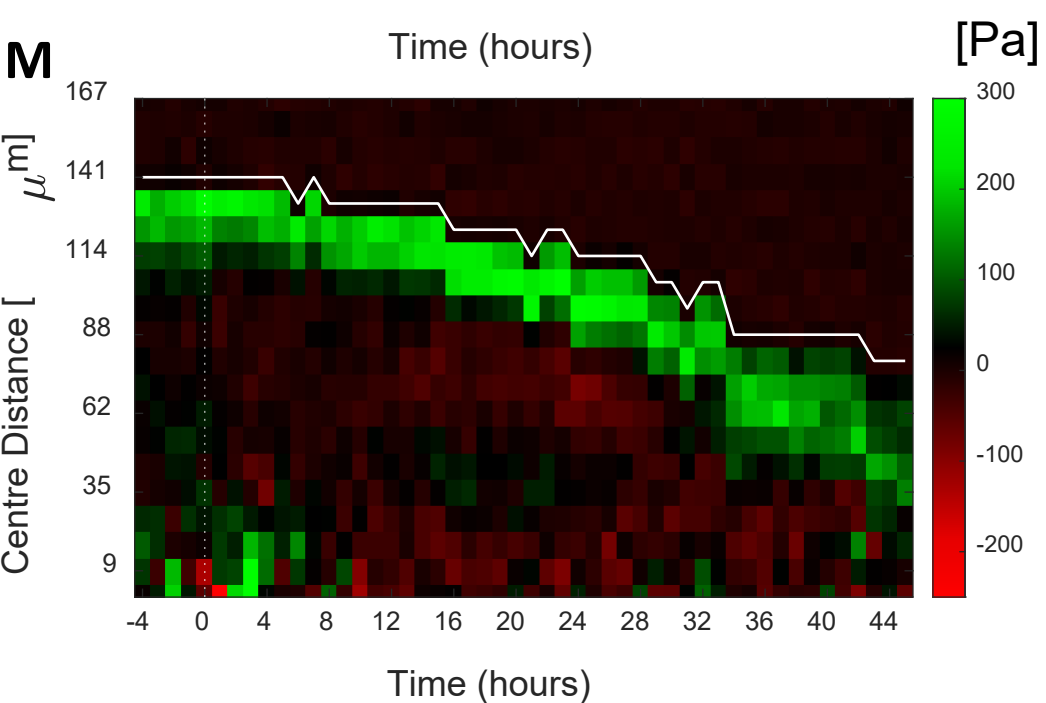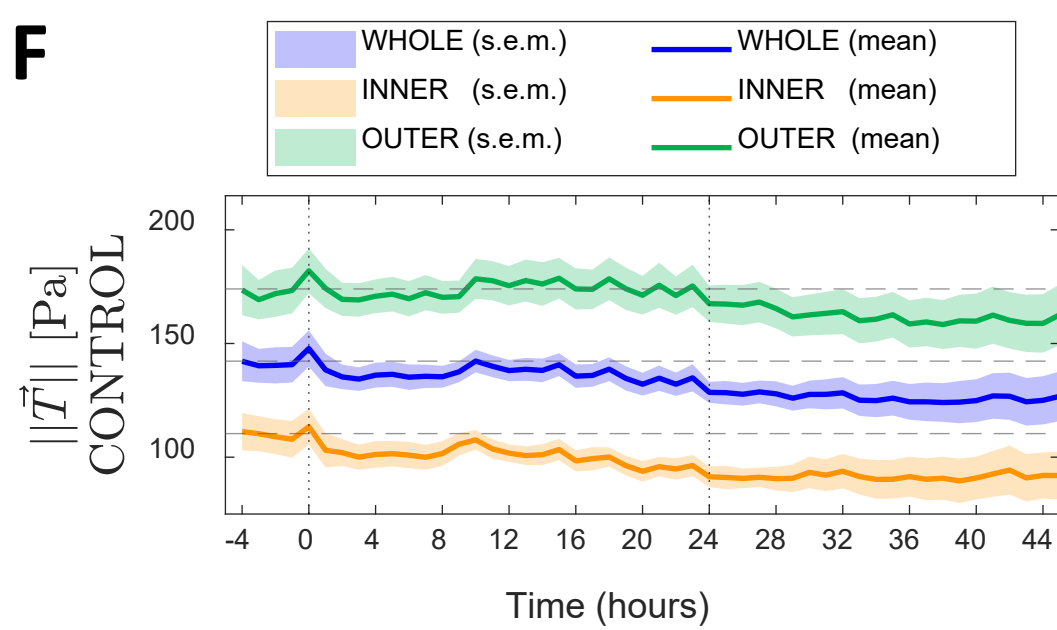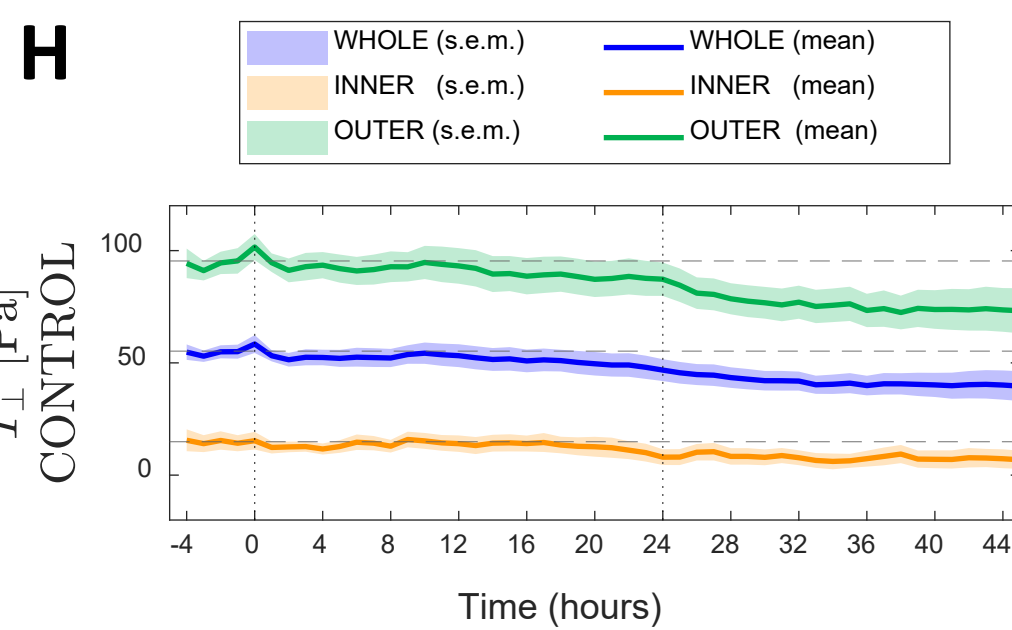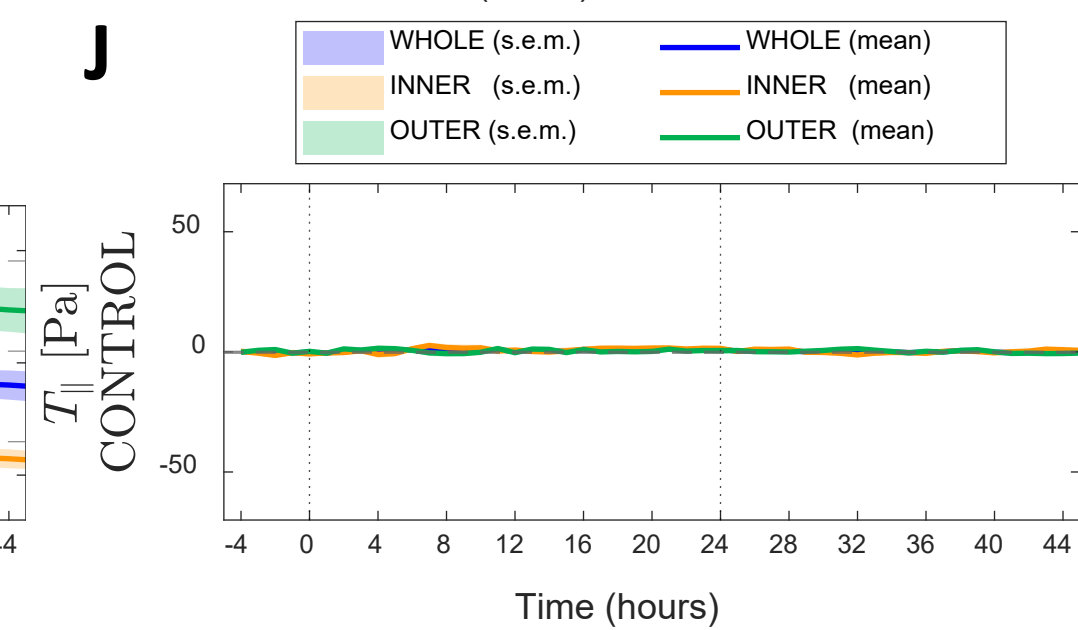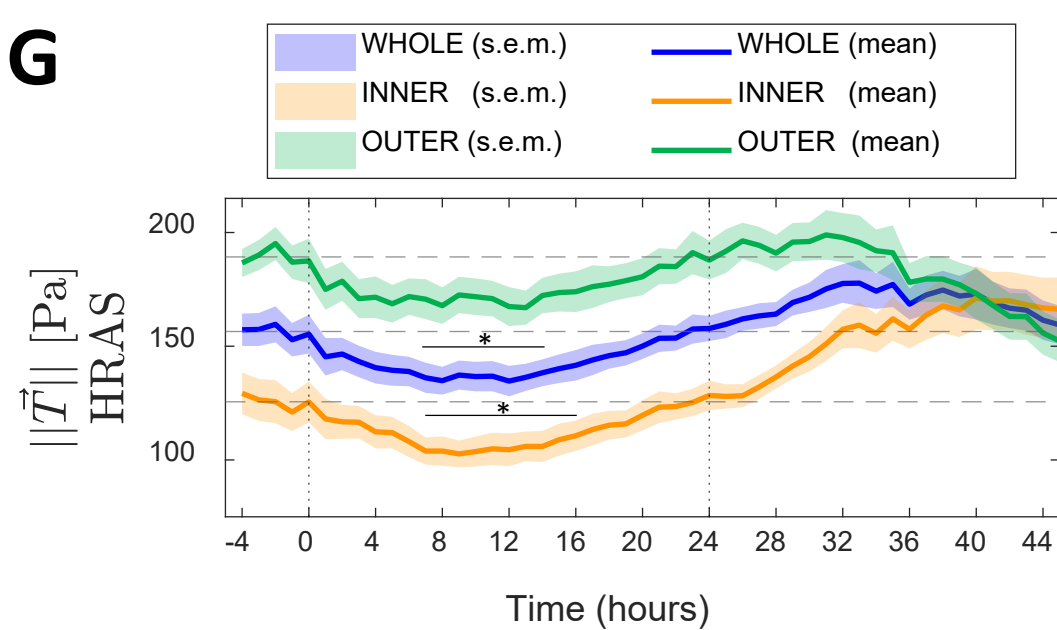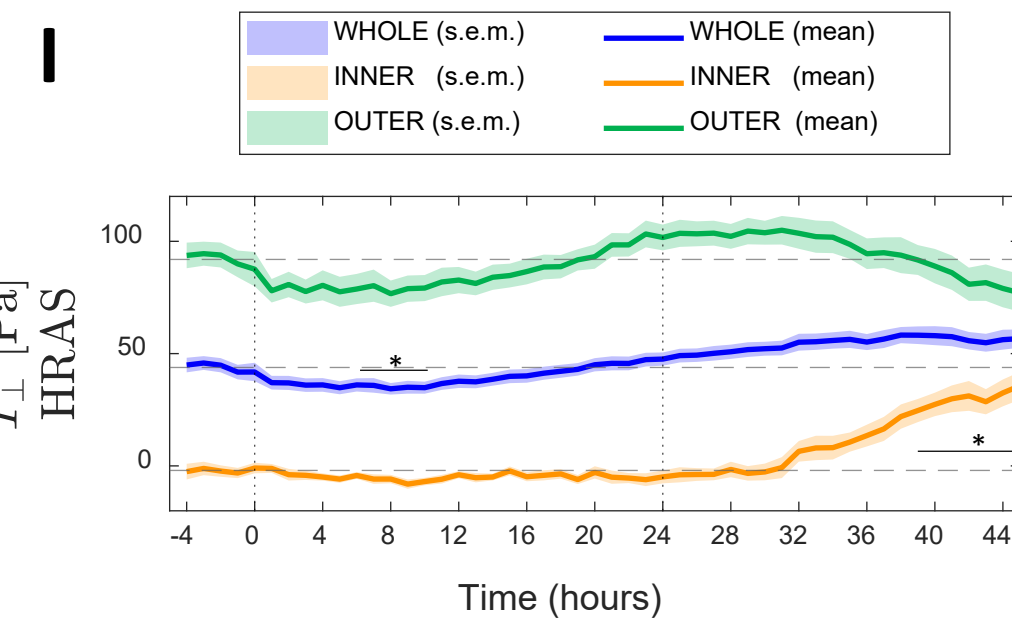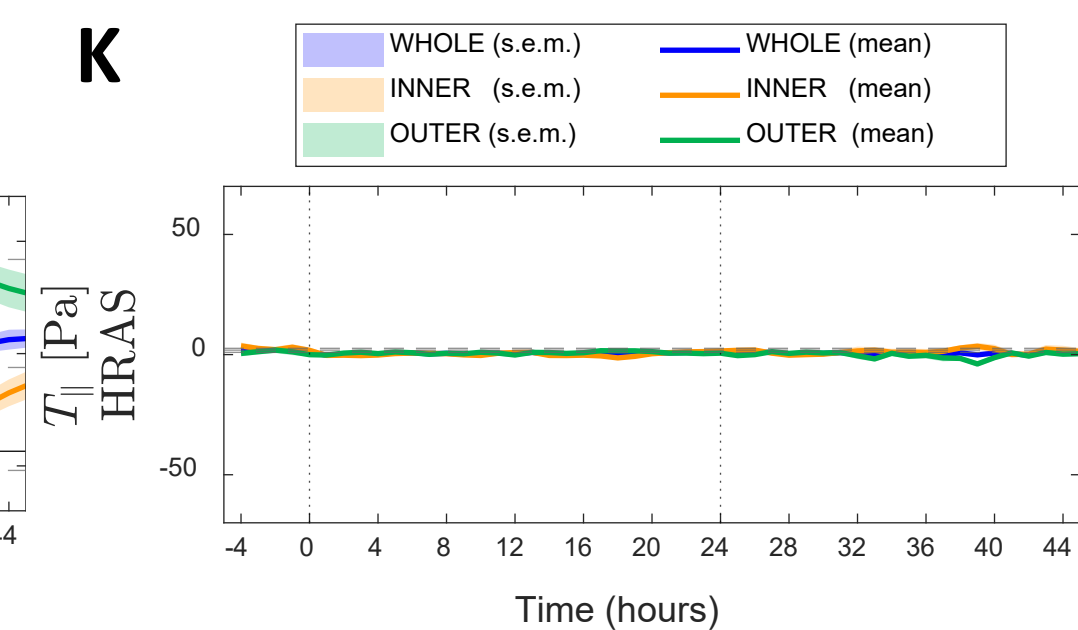



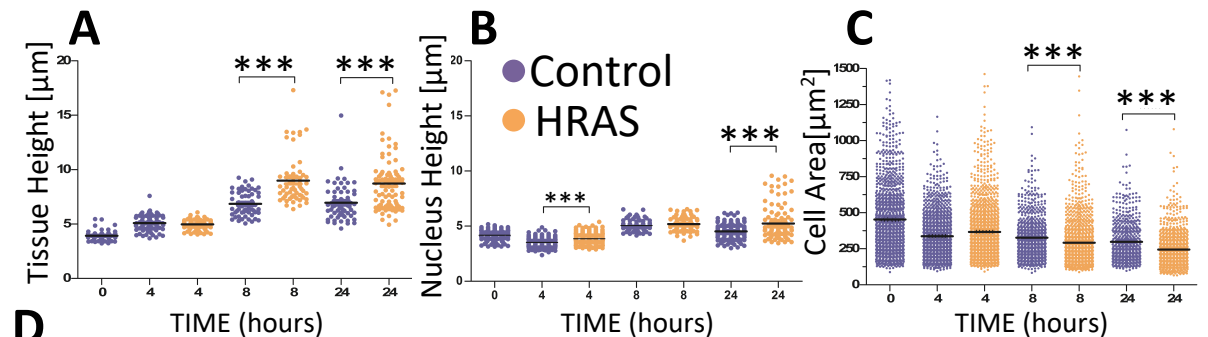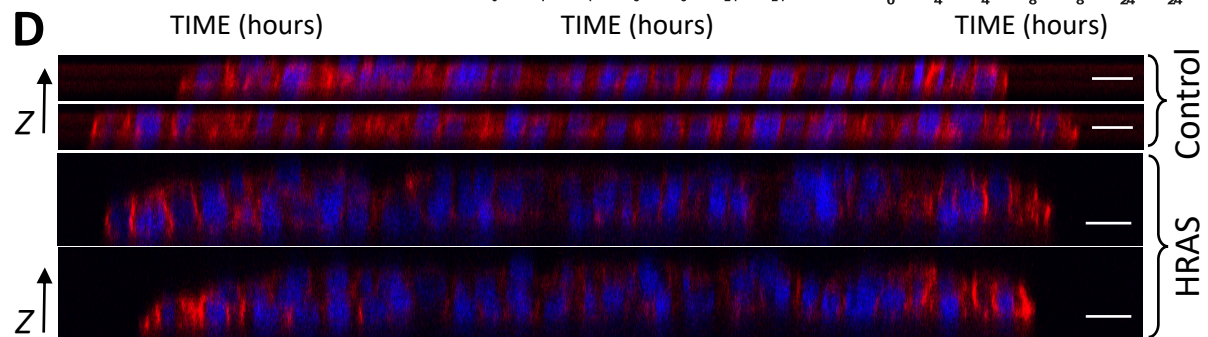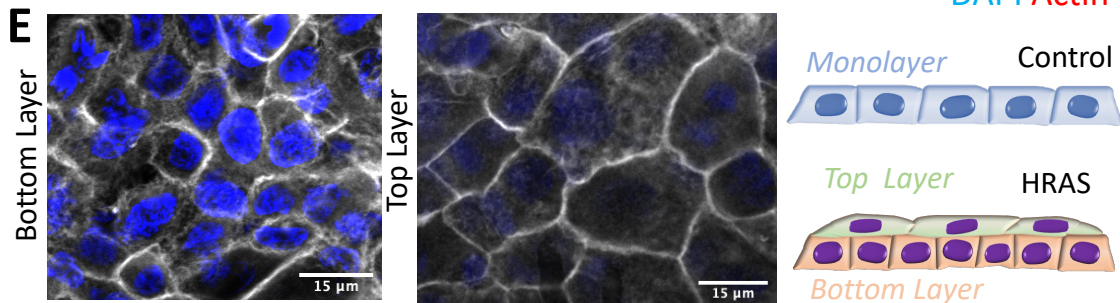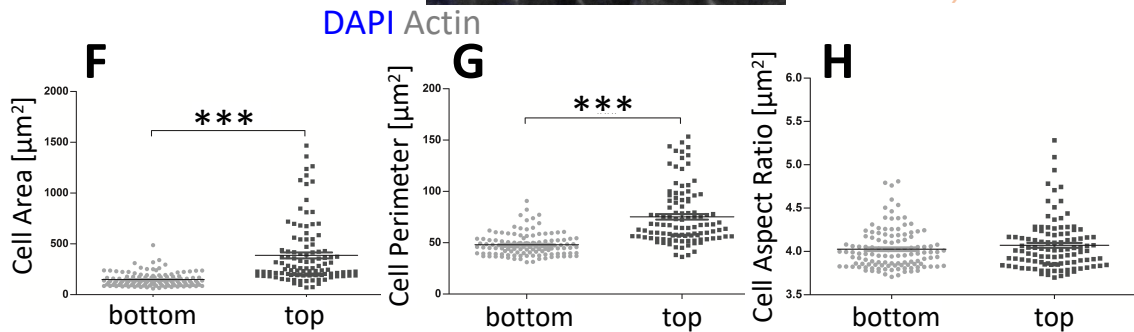







**A** Control – outer epithelial subdomain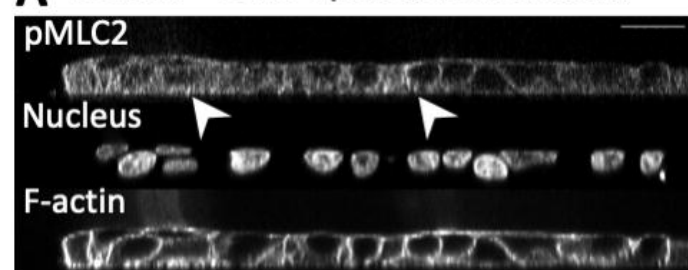

## Control – inner epithelial subdomain

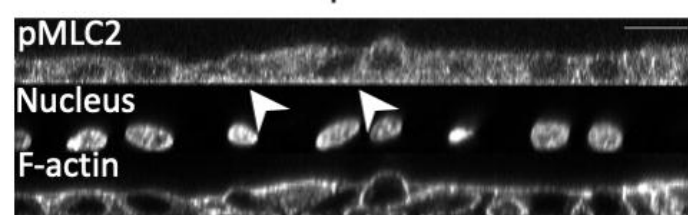**D** HRAS – outer epithelial subdomain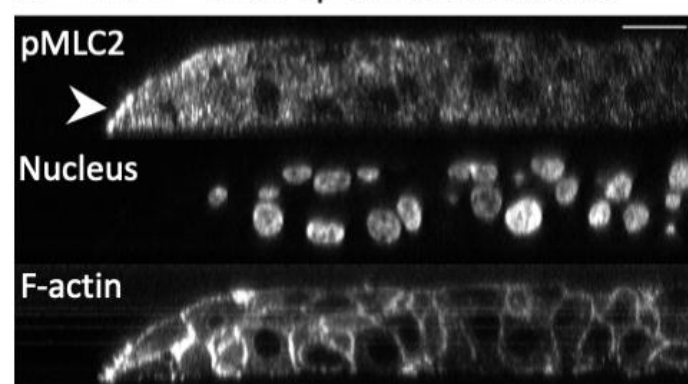

## HRAS – inner epithelial subdomain

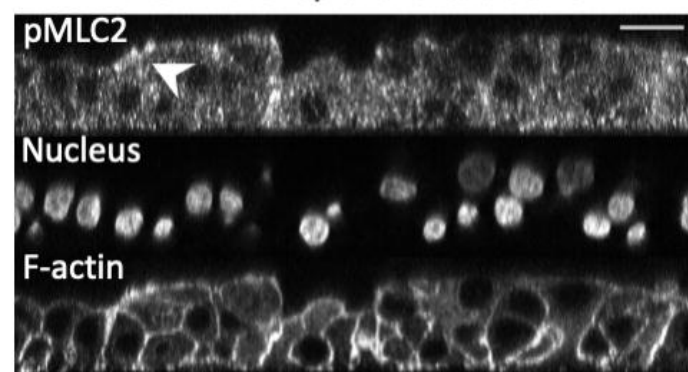**B** pMLC2 F-actin DAPI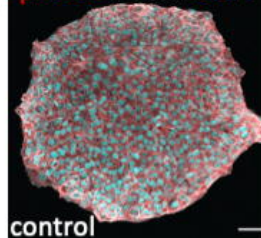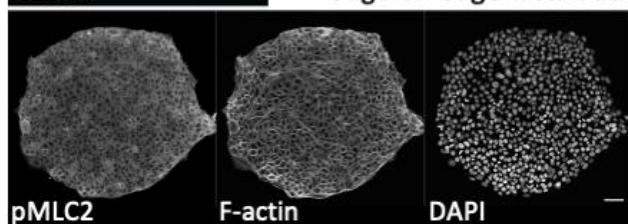**E** pMLC2 F-actin DAPI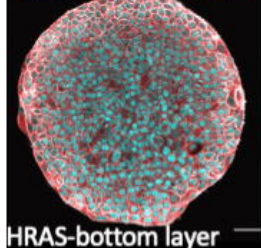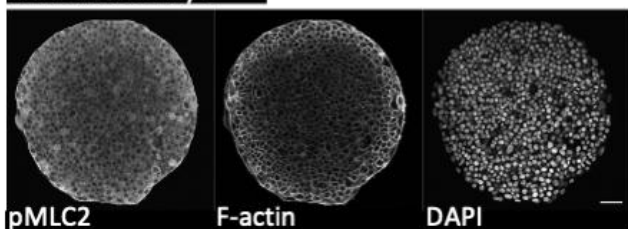**G** pMLC2 F-actin DAPI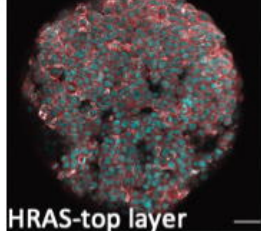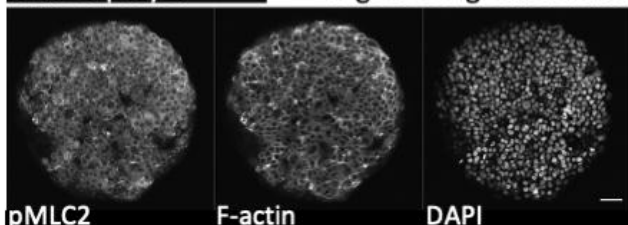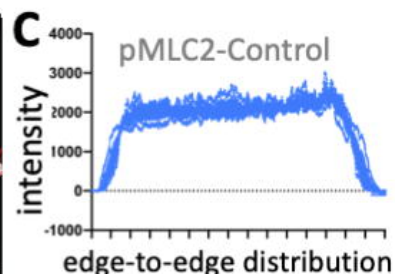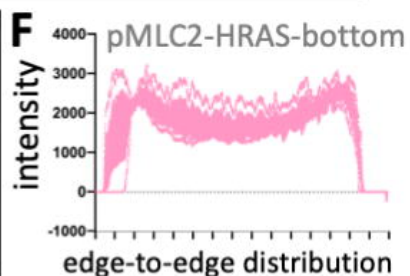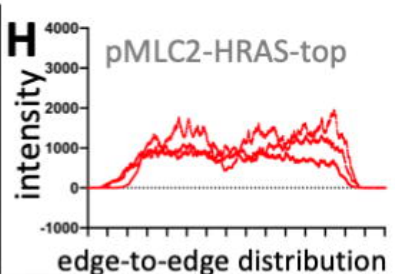

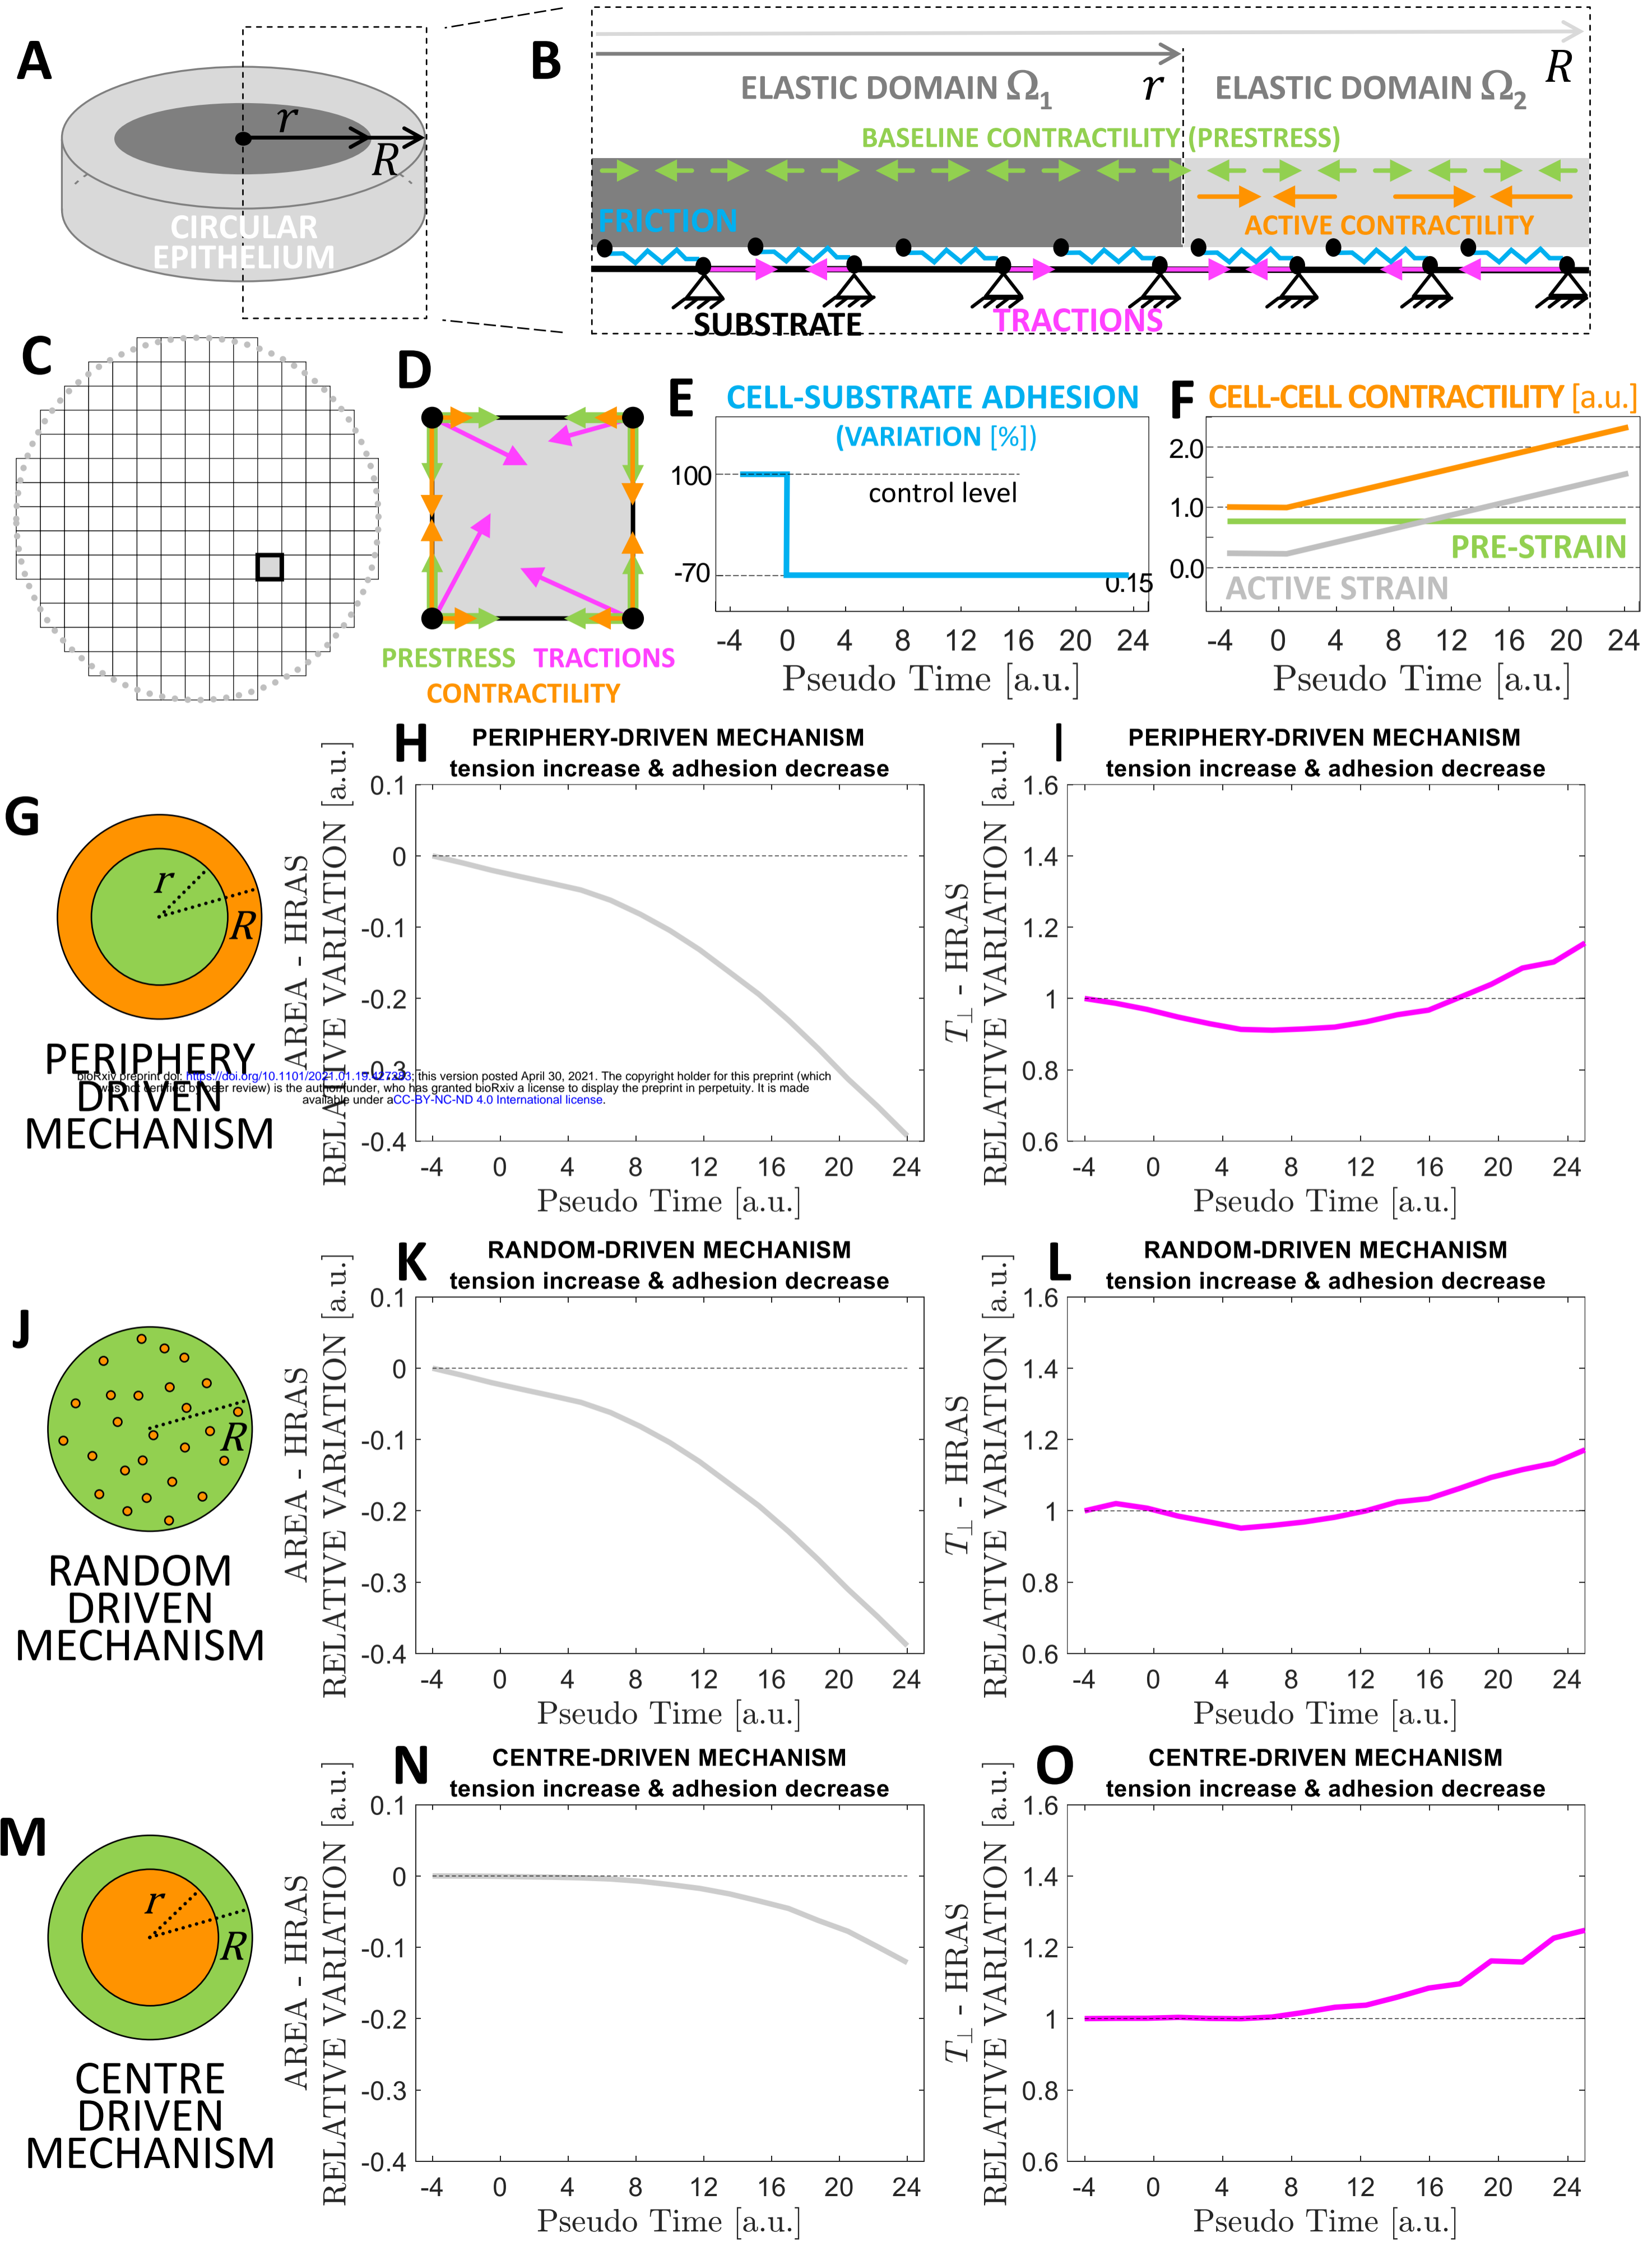

Source: https://www.biorxiv.org/content/10.1101/2021.01.19.427283v3.full.pdf
